# Supplementary material
Source: PubMed Central journal article supplement (PMC10768990)
Supplement: noad130_suppl_supplementary_material.pdf [file noad130_suppl_supplementary_material.pdf]

A

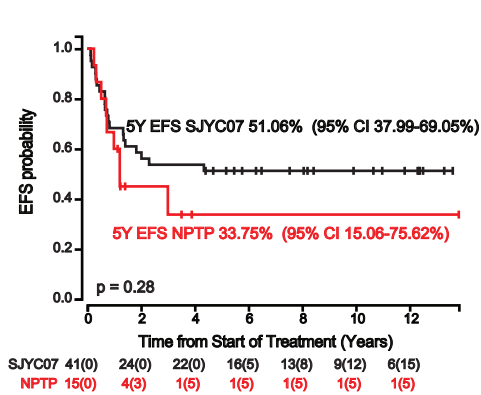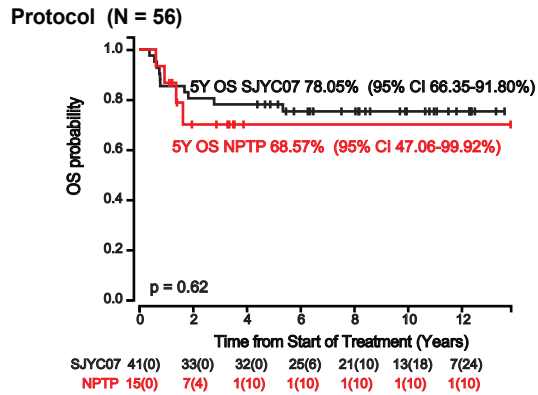

B

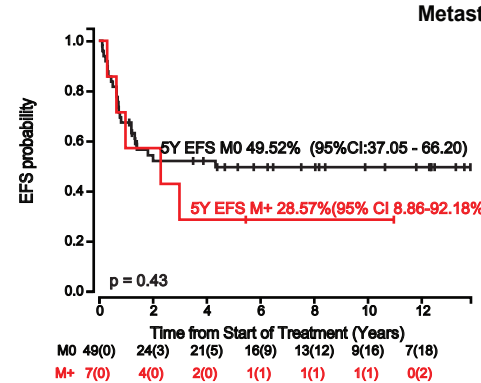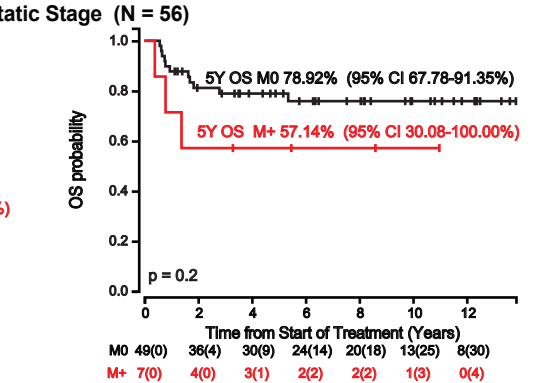

C

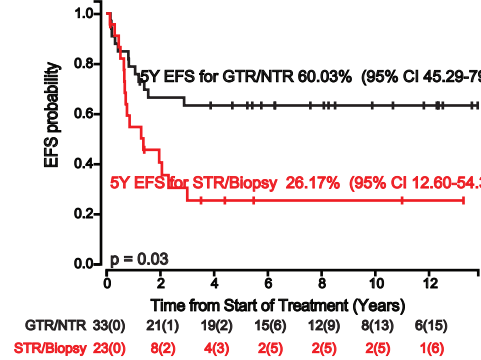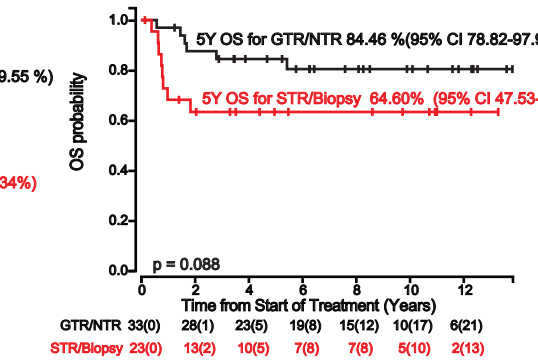

D

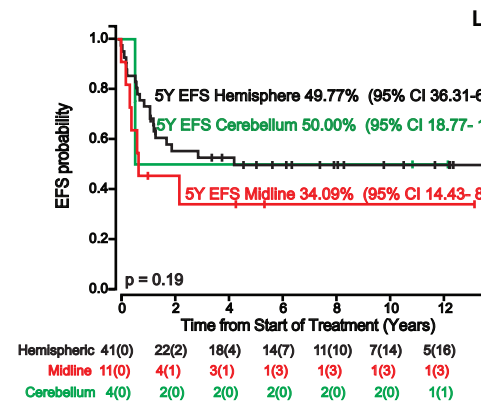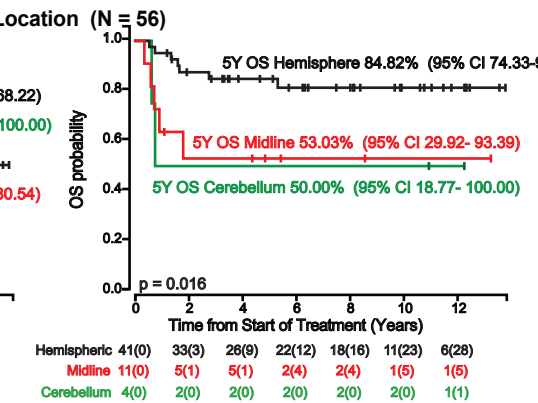

E

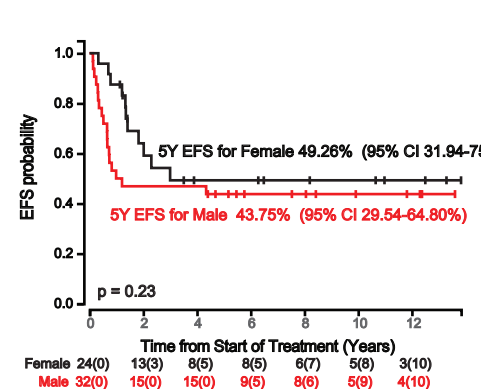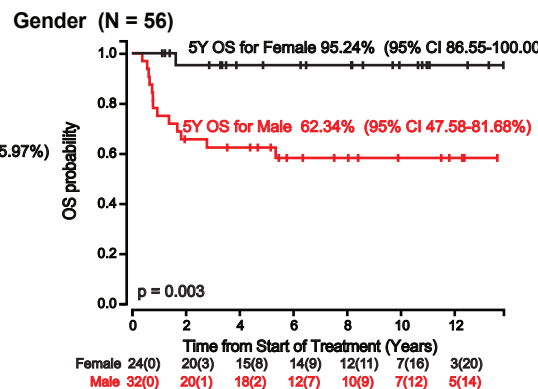

Supplemental Figure 2

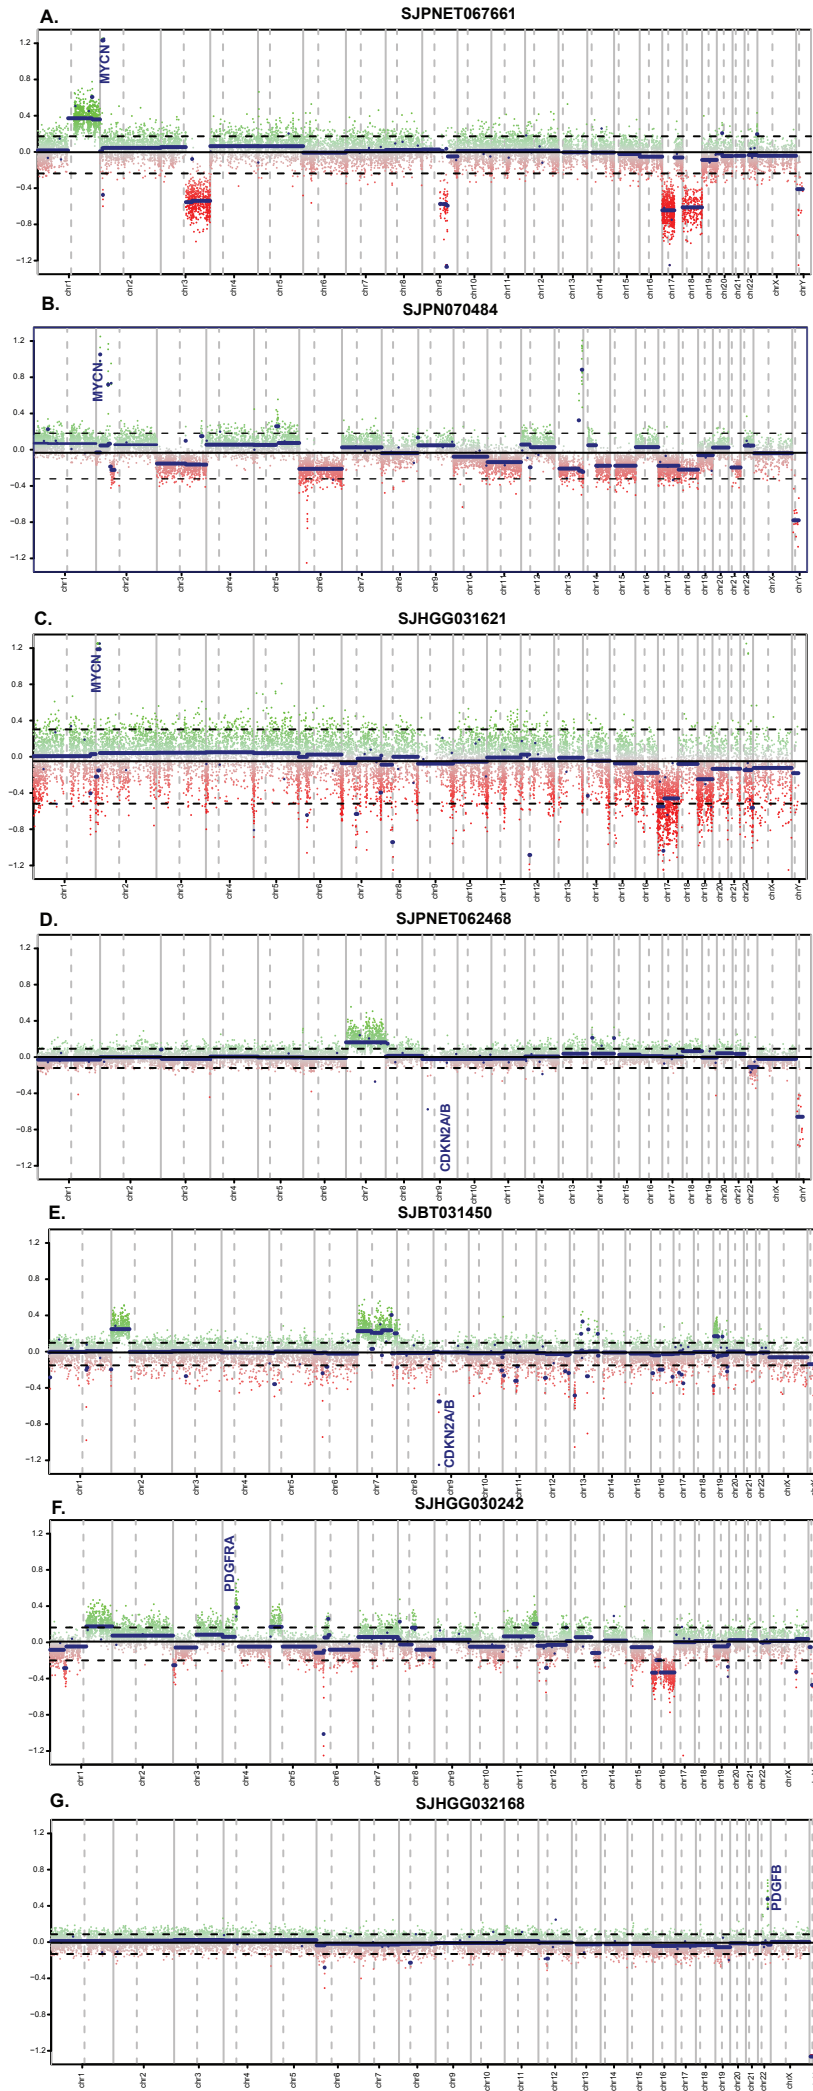

Supplemental Figure 3

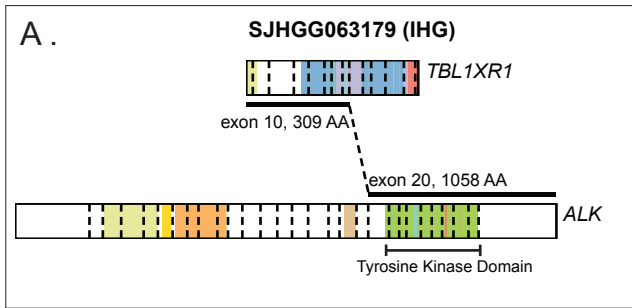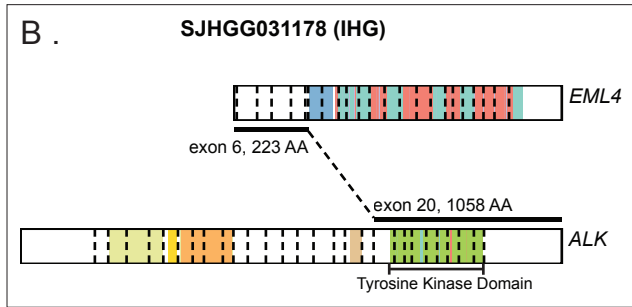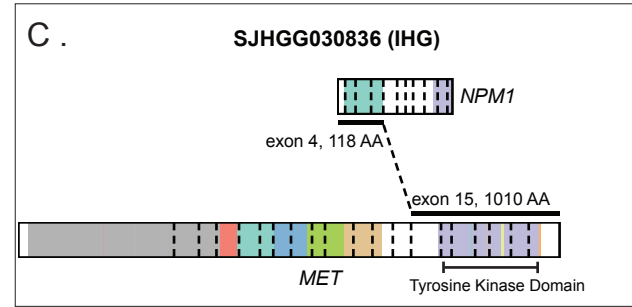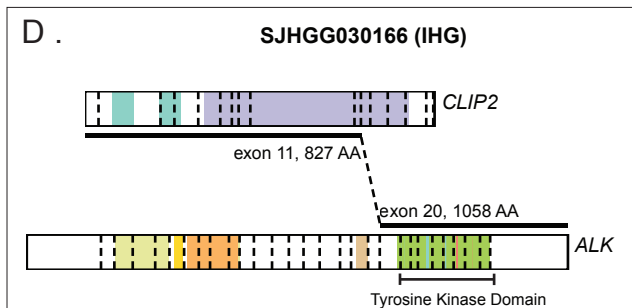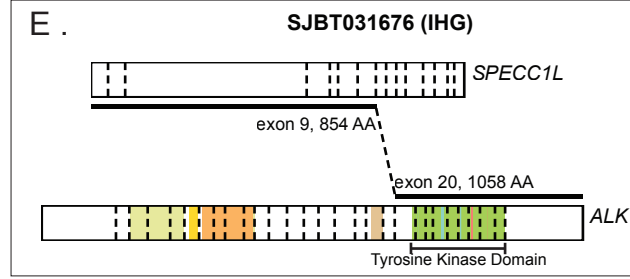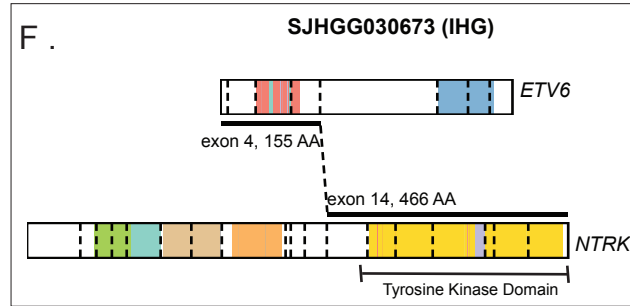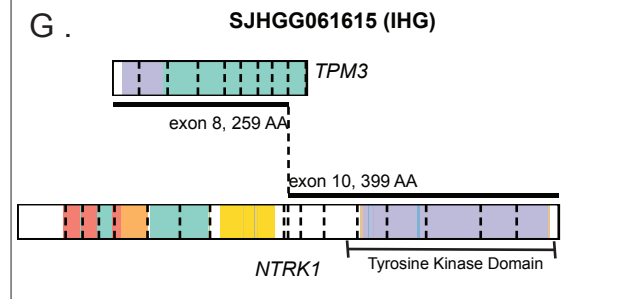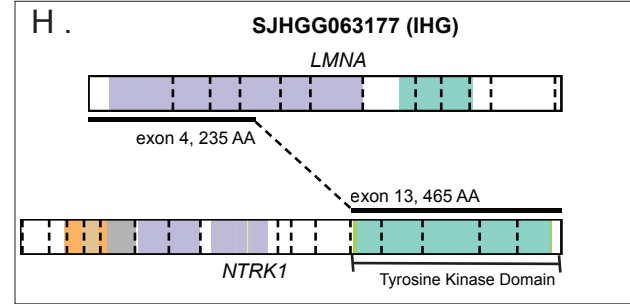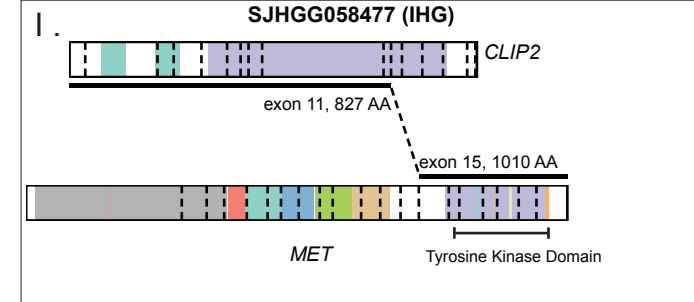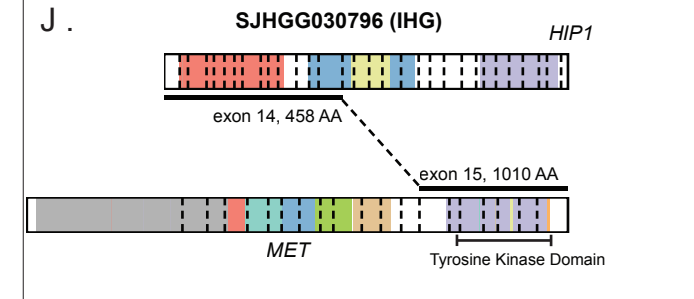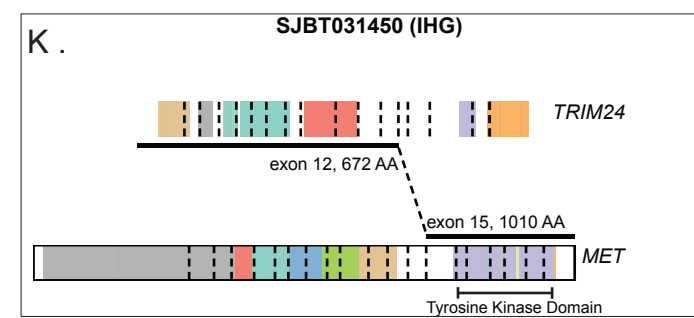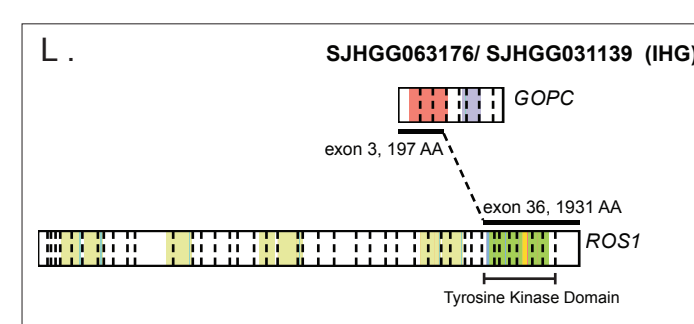

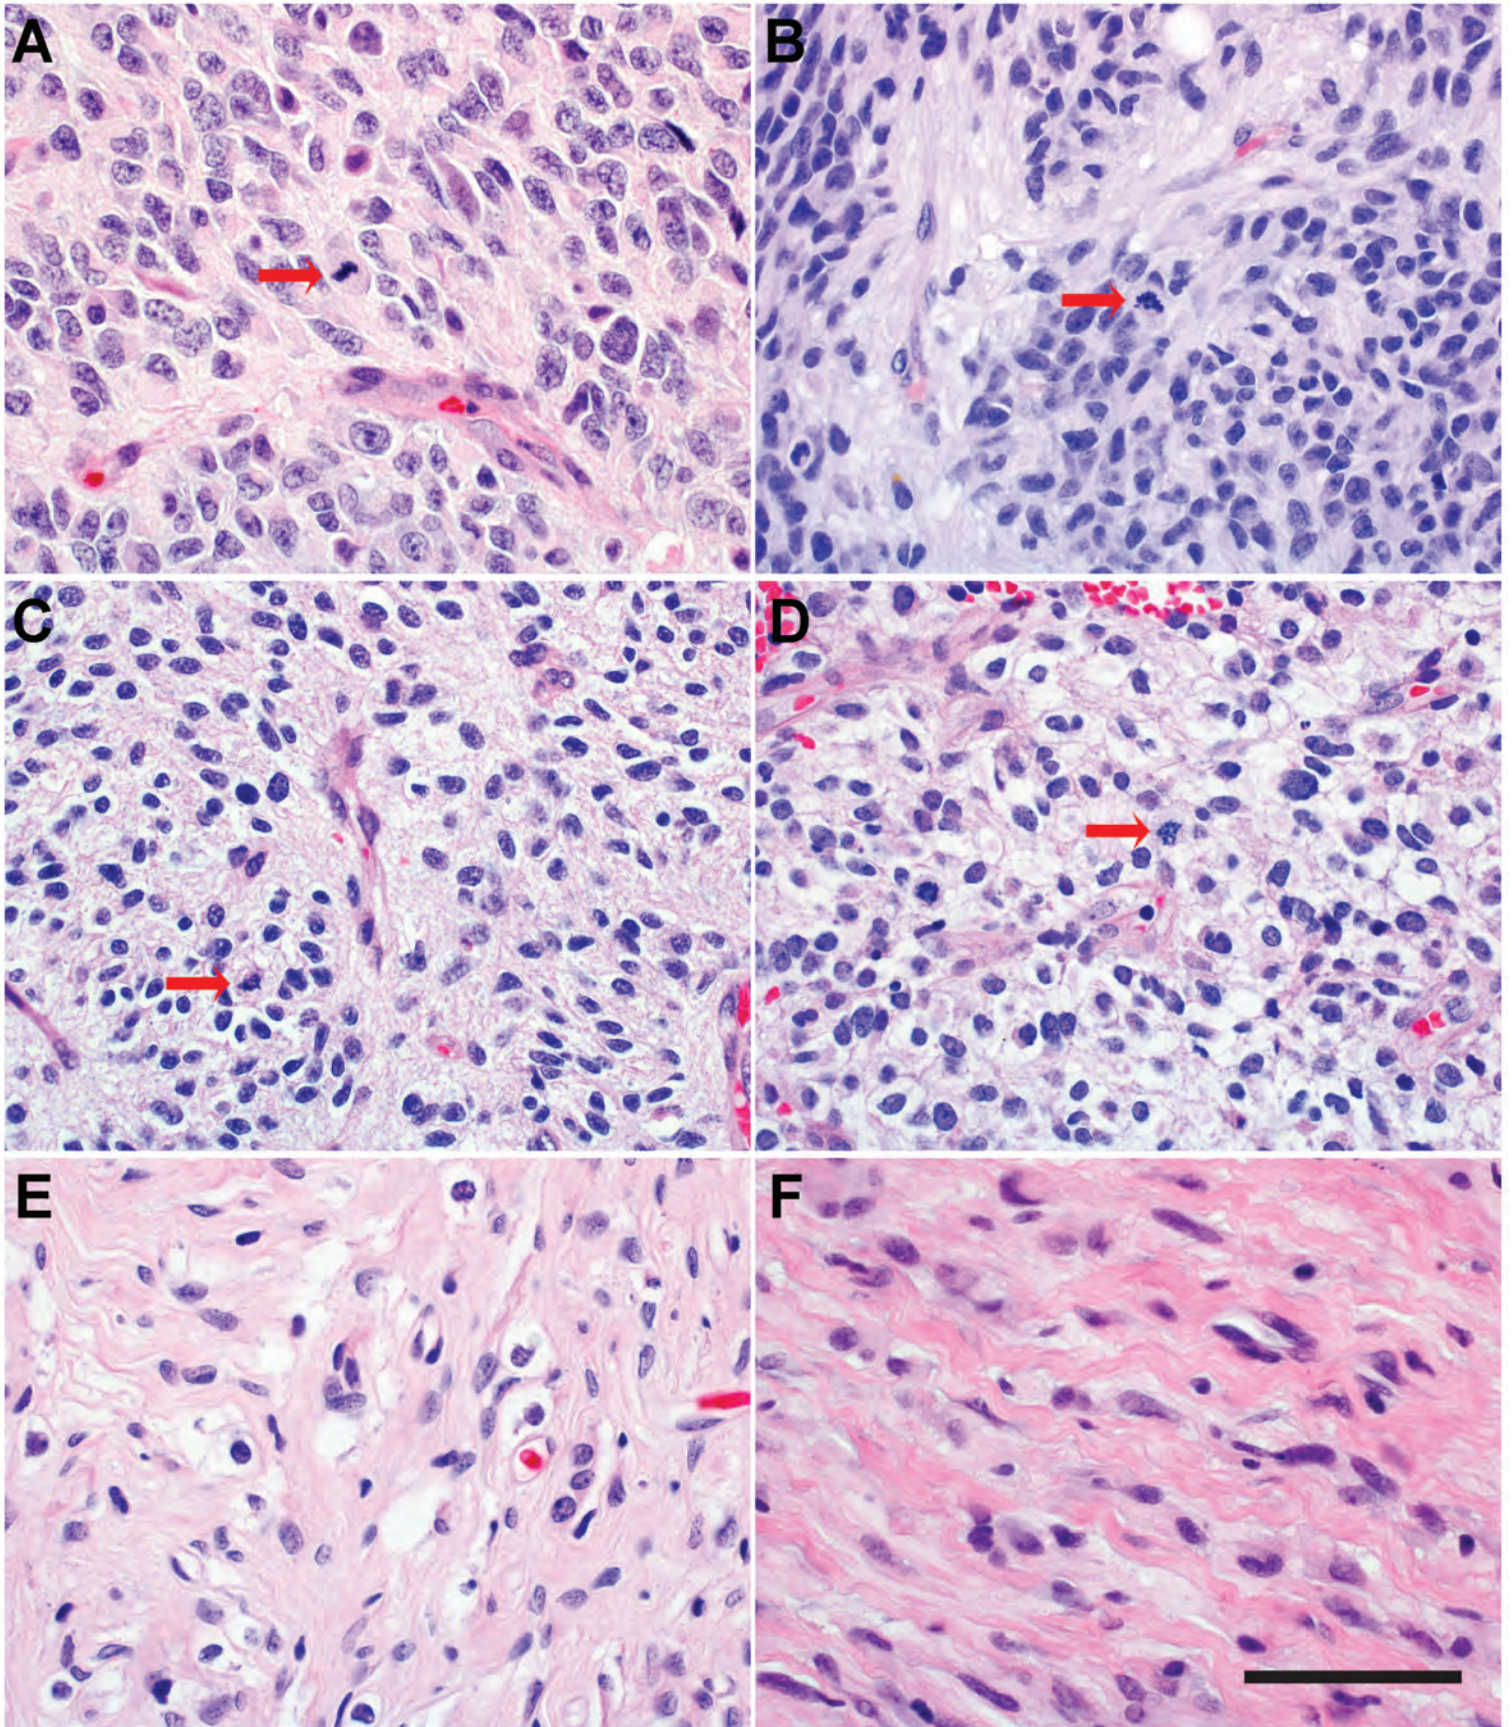

A.

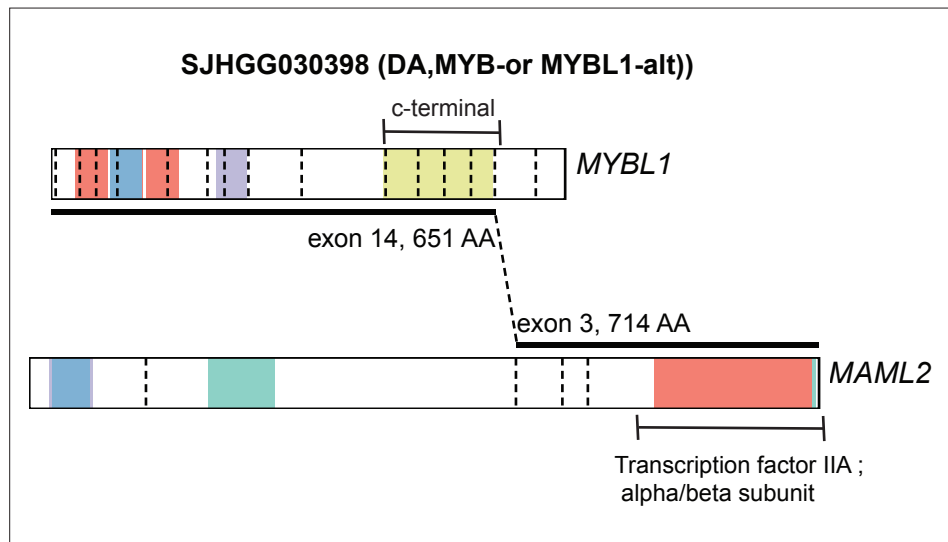

B.

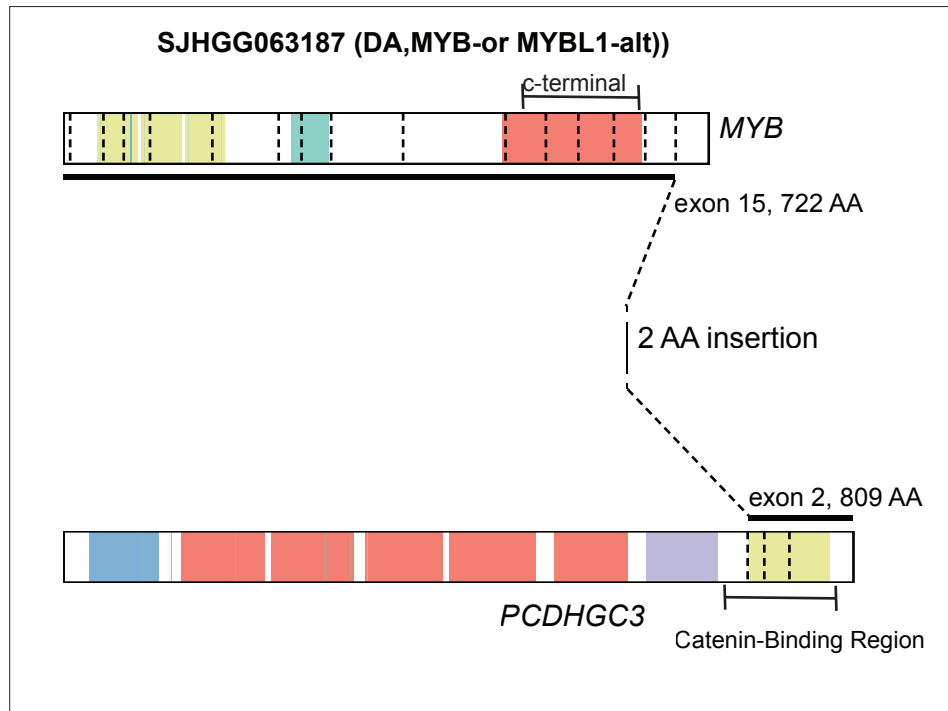

C.

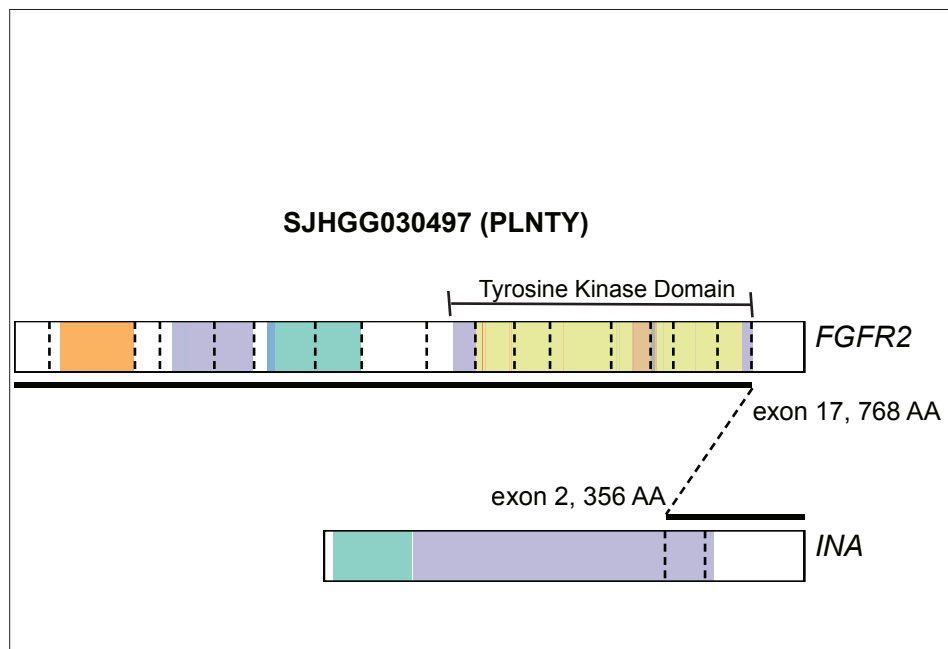

Supplemental Figure 6

**A. CNS BCOR ITD**

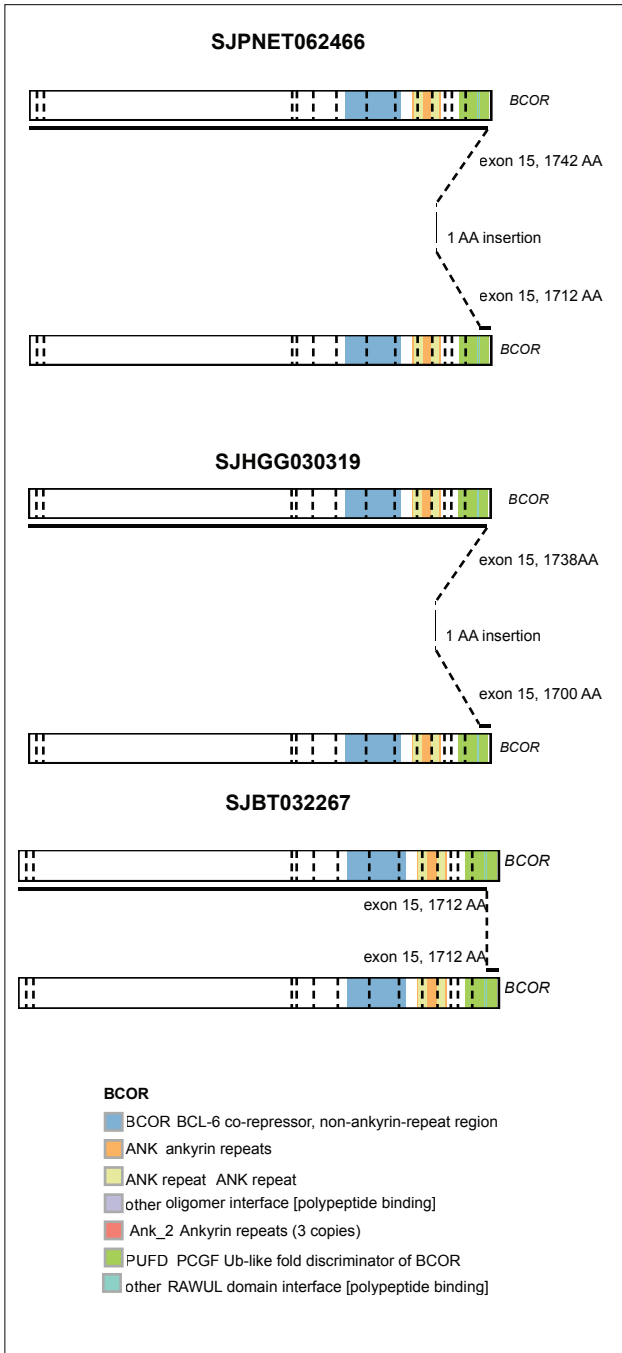

**B. CNS SARC CIC**

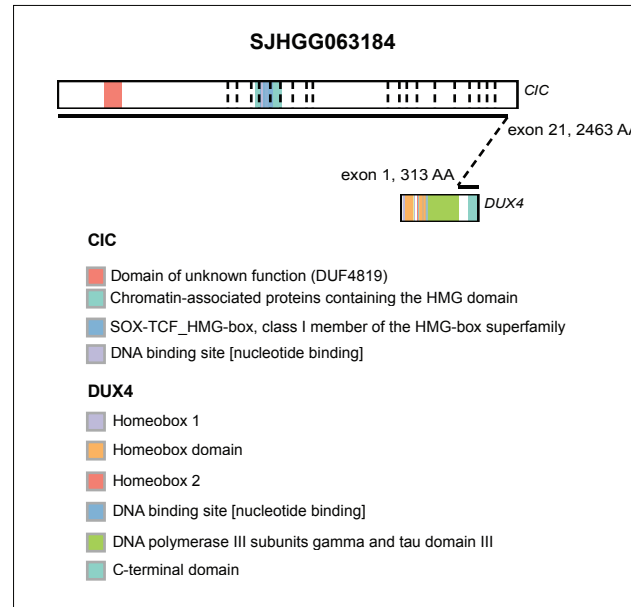

**C. NET PLAGL1**

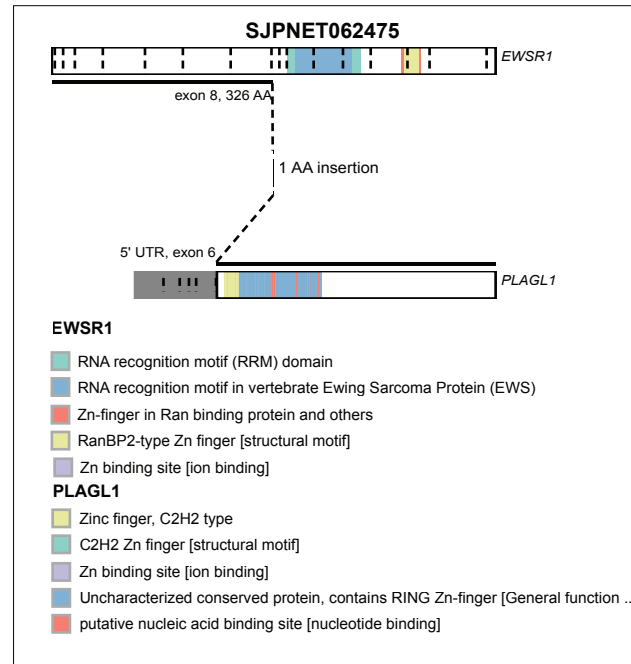

**D. NET PATZ1**

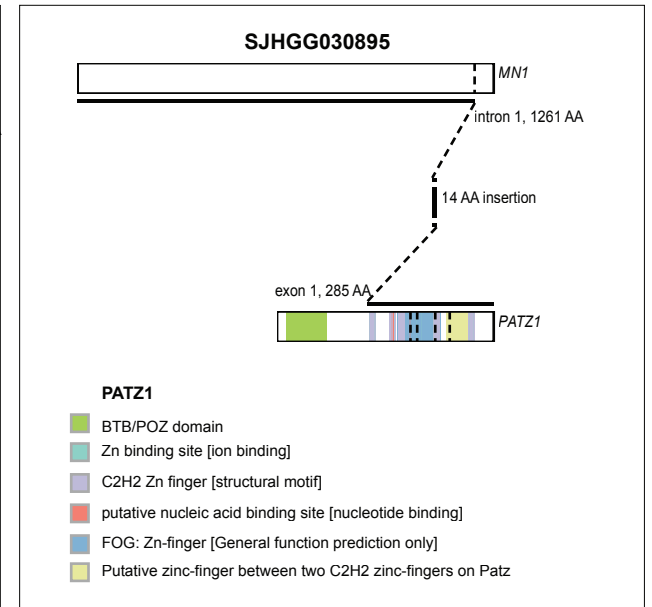

**E. CNS NB FOXR2**

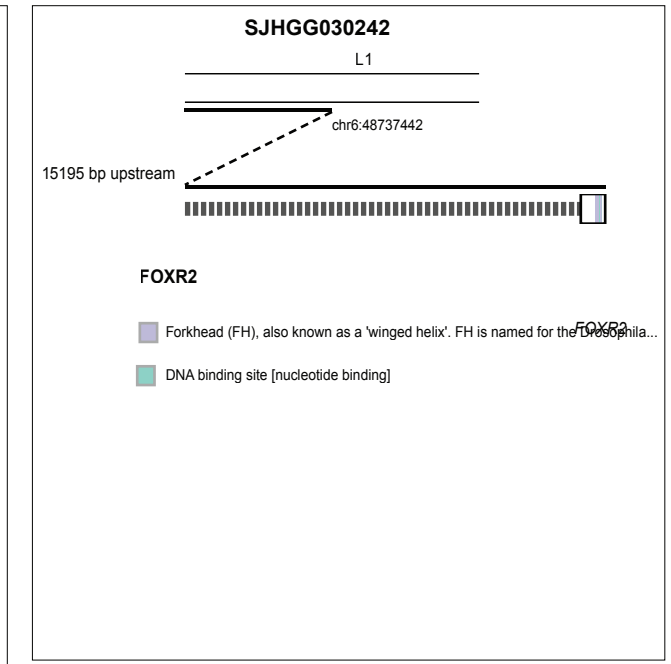

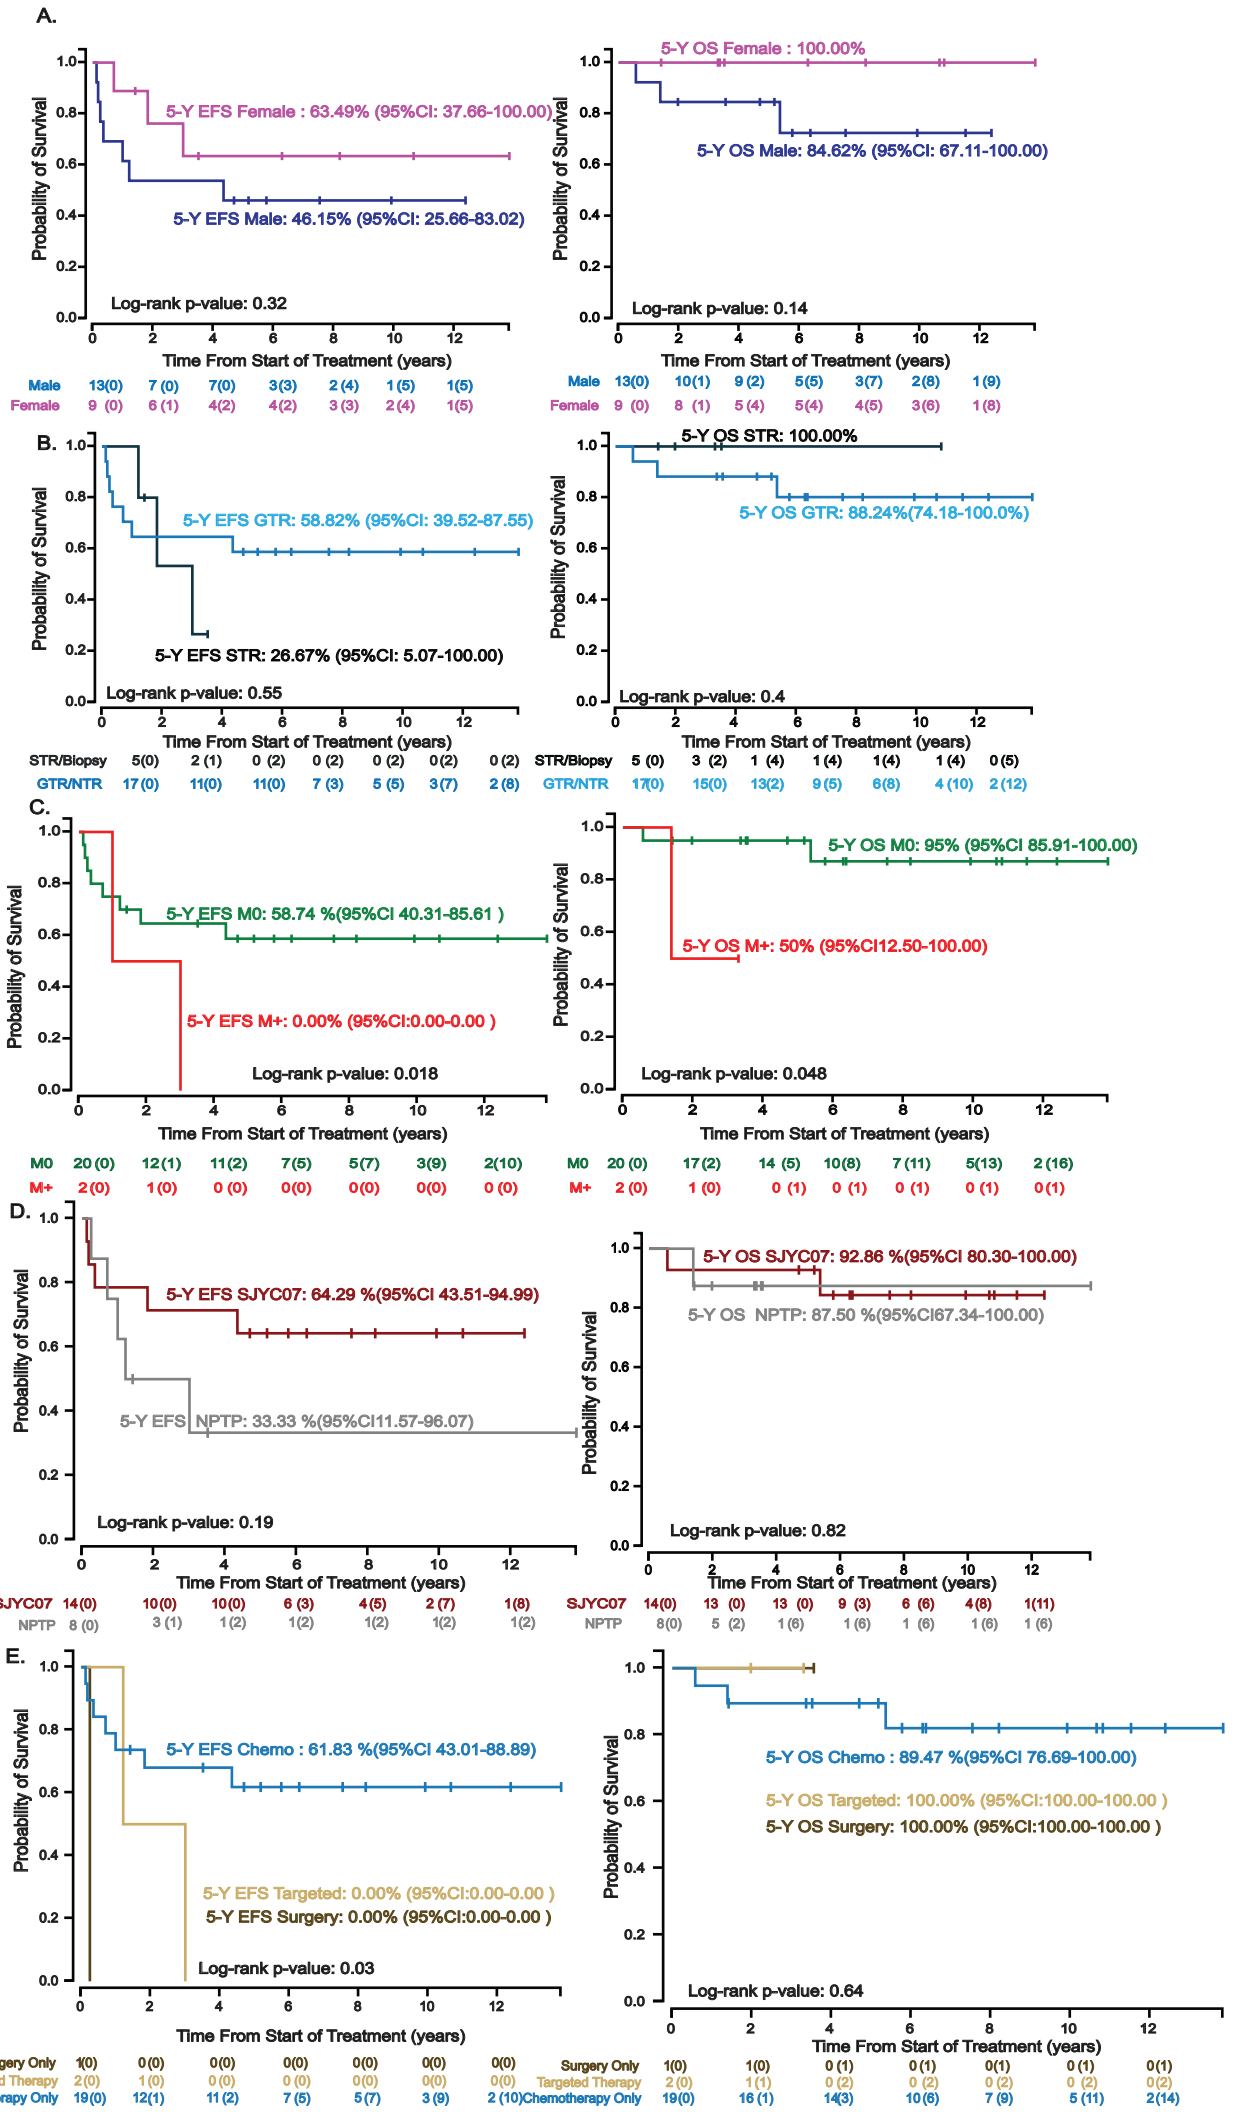

Supplemental Figure 8

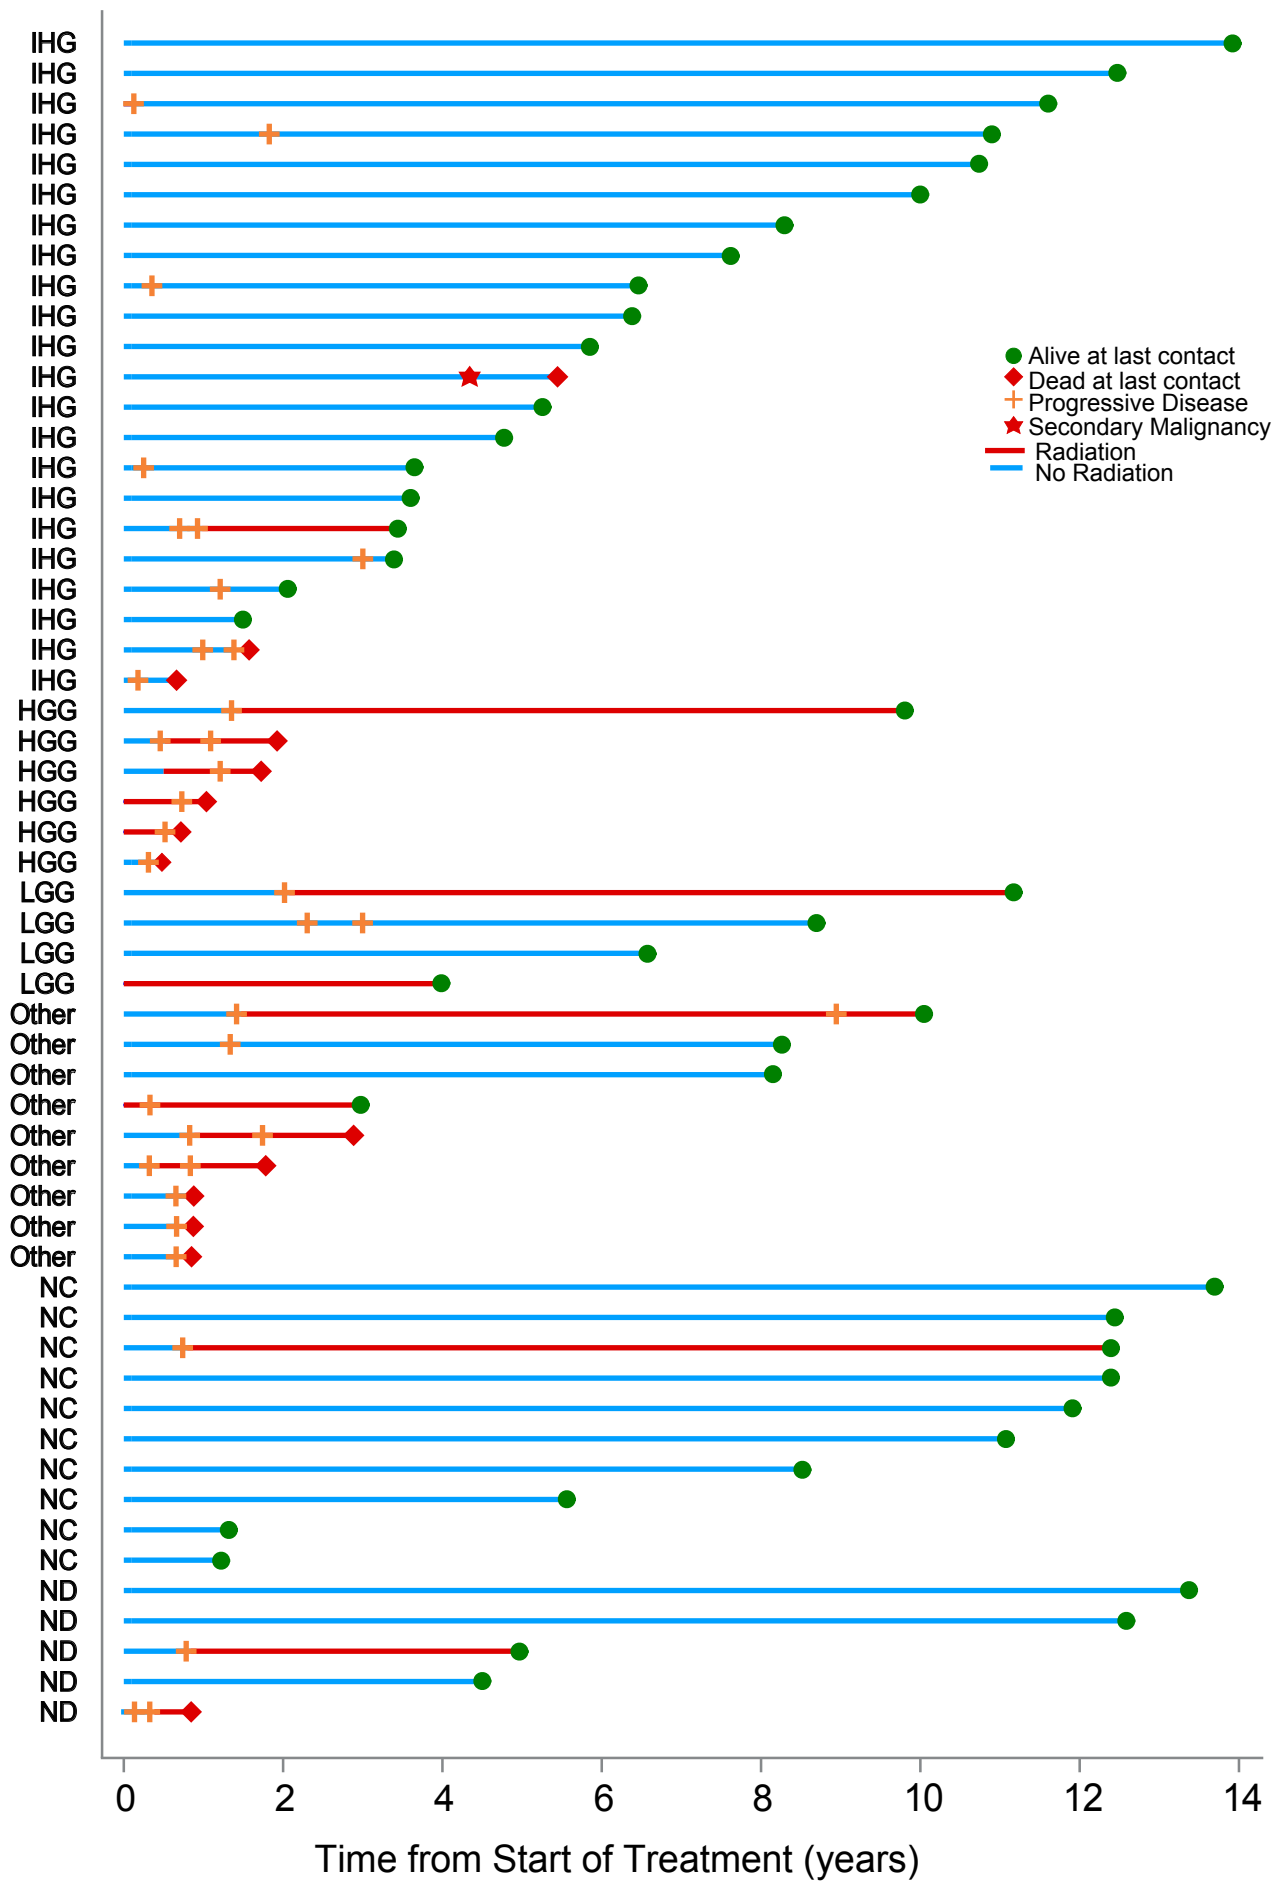



Supplemental Table 1

| Integrated Histopathology and Molecular Diagnosis |              |                        |                        |                        |                                           |              |                    | Clinical Features and Outcome |        |                   |       |            |          |                       |                           |     |                             |         |               |                               |
|---------------------------------------------------|--------------|------------------------|------------------------|------------------------|-------------------------------------------|--------------|--------------------|-------------------------------|--------|-------------------|-------|------------|----------|-----------------------|---------------------------|-----|-----------------------------|---------|---------------|-------------------------------|
| Serial No                                         | Case ID      | Integrated Diagnosis-1 | Integrated Diagnosis-2 | Integrated Diagnosis-3 | Molecular Findings                        | MNP Class    | Original Histology | Age (Y)                       | Gender | Anatomic Location | M0/M+ | Resection  | Protocol | Risk                  | Primary Treatment         | PD  | Relapse Treatment           | Outcome | Other Event   | Neuro-Cognitive Data (Yes/No) |
| 1                                                 | SJHGG063179  | IHG                    | IHG                    | IHG                    | TBL1XR1-ALK                               | IHG          | AA                 | 0.11                          | Male   | Hemispheric       | M0    | GTR/NTR    | SJYC07   | SJYC07-Low/Low-Like   | Chemotherapy Only         | Yes | No Treatment                | Dead    | NA            | No                            |
| 2                                                 | SJHGG010328  | IHG                    | IHG                    | IHG                    | PPP1CB-ALK                                | IHG          | HGG                | 0.46                          | Male   | Hemispheric       | M0    | GTR/NTR    | SJYC07   | SJYC07-Low/Low-Like   | Chemotherapy Only         | No  | NA                          | Alive   | NA            | Yes                           |
| 3                                                 | SJHGG073704  | IHG                    | IHG                    | IHG                    | CDC88A-ALK                                | IHG          | HGG                | 1.05                          | Male   | Hemispheric       | M0    | GTR/NTR    | SJYC07   | SJYC07-Low/Low-Like   | Chemotherapy Only         | No  | NA                          | Alive   | NA            | Yes                           |
| 4                                                 | SJHGG030397  | IHG                    | IHG                    | IHG                    | CDC88A-ALK                                | IHG          | GB                 | 0.10                          | Male   | Hemispheric       | M0    | GTR/NTR    | SJYC07   | SJYC07-Low/Low-Like   | Chemotherapy Only         | No  | NA                          | Alive   | NA            | Yes                           |
| 5                                                 | SJHGG031178  | IHG                    | IHG                    | IHG                    | EML4-ALK                                  | IHG          | HGG                | 1.59                          | Female | Hemispheric       | M0    | GTR/NTR    | NPTP     | SJYC07-Low/Low-Like   | Chemotherapy Only         | Yes | Targeted Therapy > Focal RT | Alive   | NA            | No                            |
| 6                                                 | SJHGG030166  | IHG                    | IHG                    | IHG                    | CLIP2-ALK                                 | IHG          | HGG                | 0.08                          | Male   | Hemispheric       | M0    | GTR/NTR    | SJYC07   | SJYC07-Low/Low-Like   | Chemotherapy Only         | No  | NA                          | Alive   | NA            | No                            |
| 7                                                 | SJBT031676   | IHG                    | IHG                    | IHG                    | SPECC1L-ALK                               | IHG          | HGG                | 3.19                          | Male   | Hemispheric       | M0    | STR/Biopsy | NPTP     | Other                 | Targeted Therapy          | Yes | Targeted Therapy            | Alive   | NA            | No                            |
| 8                                                 | SJBT031842   | IHG                    | IHG                    | IHG                    | ALK rearrangement                         | NC           | HGG                | 1.23                          | Female | Hemispheric       | M0    | STR/Biopsy | NPTP     | SJYC07-Low/Low-Like   | Chemotherapy Only         | No  | NA                          | Alive   | NA            | No                            |
| 9                                                 | SJHGG063182  | IHG                    | IHG                    | IHG                    | ALK rearrangement                         | NC           | HGG                | 1.49                          | Male   | Hemispheric       | M0    | GTR/NTR    | SJYC07   | SJYC07-Low/Low-Like   | Chemotherapy Only         | No  | NA                          | Alive   | NA            | No                            |
| 10                                                | SJHGG061615  | IHG                    | IHG                    | IHG                    | TPM3-NTRK1                                | IHG          | HGNET              | 0.45                          | Male   | Hemispheric       | M0    | GTR/NTR    | SJYC07   | SJYC07-Low/Low-Like   | Chemotherapy Only         | Yes | Surgery                     | Alive   | NA            | No                            |
| 11                                                | SJHGG063177  | IHG                    | IHG                    | IHG                    | LMNA-NTRK1                                | IHG          | GB                 | 0.18                          | Female | Hemispheric       | M0    | STR/Biopsy | SJYC07   | SJYC07-Low/Low-Like   | Chemotherapy Only         | Yes | Surgery + Chemotherapy      | Alive   | NA            | Yes                           |
| 12                                                | SJHGG030673  | IHG                    | IHG                    | IHG                    | ETV6-NTRK3                                | IHG          | GB                 | 0.11                          | Male   | Hemispheric       | M0    | GTR/NTR    | NPTP     | Other                 | Surgery Only              | Yes | No Treatment                | Alive   | NA            | No                            |
| 13                                                | SJHGG058477  | IHG                    | IHG                    | IHG                    | CLIP2-MET                                 | NC           | GB                 | 0.03                          | Female | Hemispheric       | M0    | GTR/NTR    | SJYC07   | SJYC07-Low/Low-Like   | Chemotherapy Only         | No  | NA                          | Alive   | NA            | No                            |
| 14                                                | SJPNET030836 | IHG                    | IHG                    | IHG                    | NPM1-ALK                                  | IHG          | GB                 | 0.00                          | Male   | Hemispheric       | M0    | GTR/NTR    | SJYC07   | SJYC07-Low/Low-Like   | Chemotherapy Only         | Yes | Surgery + Chemotherapy      | Alive   | NA            | No                            |
| 15                                                | SJHGG030796  | IHG                    | IHG                    | IHG                    | HIP1-MET                                  | IHG          | GB                 | 0.22                          | Female | Hemispheric       | M0    | STR/Biopsy | NPTP     | SJYC07-Low/Low-Like   | Chemotherapy Only         | No  | NA                          | Alive   | NA            | No                            |
| 16                                                | SJBT031450   | IHG                    | IHG                    | IHG                    | TRIM24-MET                                | NC           | HGNET              | 0.55                          | Male   | Hemispheric       | M+    | GTR/NTR    | NPTP     | SJYC07-High/High-Like | Chemotherapy Only         | Yes | Surgery + Targeted Therapy  | Dead    | NA            | No                            |
| 17                                                | SJHGG063176  | IHG                    | IHG                    | IHG                    | GOPC-ROS1                                 | IHG          | GB                 | 0.28                          | Male   | Hemispheric       | M0    | GTR/NTR    | SJYC07   | SJYC07-Low/Low-Like   | Chemotherapy Only         | No  | NA                          | Alive   | NA            | Yes                           |
| 18                                                | SJHGG031139  | IHG                    | IHG                    | IHG                    | GOPC-ROS1                                 | IHG          | AA                 | 4.40                          | Female | Hemispheric       | M+    | STR/Biopsy | NPTP     | Other                 | Targeted Therapy          | Yes | Targeted Therapy            | Alive   | NA            | No                            |
| 19                                                | SJPNET067666 | IHG                    | IHG                    | IHG                    | None detected                             | IHG          | HGNET              | 0.12                          | Female | Hemispheric       | M0    | GTR/NTR    | NPTP     | SJYC07-Low/Low-Like   | Chemotherapy Only         | No  | NA                          | Alive   | NA            | Yes                           |
| 20                                                | SJHGG063178  | IHG                    | IHG                    | IHG                    | None detected                             | IHG          | HGNET              | 0.86                          | Male   | Hemispheric       | M0    | GTR/NTR    | SJYC07   | SJYC07-Low/Low-Like   | Chemotherapy Only         | No  | NA                          | Alive   | NA            | No                            |
| 21                                                | SJHGG063180  | IHG                    | IHG                    | IHG                    | None detected                             | IHG          | HGG                | 0.42                          | Female | Hemispheric       | M0    | GTR/NTR    | SJYC07   | SJYC07-Low/Low-Like   | Chemotherapy Only         | No  | NA                          | Alive   | NA            | Yes                           |
| 22                                                | SJHGG063181  | IHG                    | IHG                    | IHG                    | None detected                             | IHG          | GB                 | 0.30                          | Male   | Hemispheric       | M0    | GTR/NTR    | SJYC07   | SJYC07-Low/Low-Like   | Chemotherapy Only         | No  | NA                          | Dead    | Secondary AML | No                            |
| 1                                                 | SJPNET062468 | Non-IHG                | HGG                    | PXA                    | CDKN2A HD                                 | PXA          | HGNET              | 1.70                          | Female | Hemispheric       | M0    | STR/Biopsy | SJYC07   | SJYC07-Low/Low-Like   | Chemotherapy Only         | Yes | Focal RT                    | Alive   | NA            | Yes                           |
| 2                                                 | SJEPD066767  | Non-IHG                | HGG                    | DMG H3K27M             | H3K27M                                    | DMGH3K27M    | AA                 | 2.37                          | Male   | Midline           | M0    | STR/Biopsy | SJYC07   | SJYC07-Low/Low-Like   | Chemotherapy Only         | Yes | Focal RT                    | Dead    | NA            | No                            |
| 3                                                 | SJPNET070484 | Non-IHG                | HGG                    | pHGG MYCN              | MYCN Amplification                        | NC           | HGNET              | 2.82                          | Male   | Midline           | M+    | STR/Biopsy | SJYC07   | SJYC07-High/High-Like | Chemotherapy Only         | Yes | Palliative                  | Dead    | NA            | No                            |
| 4                                                 | SJHGG031321  | Non-IHG                | HGG                    | pHGG MYCN              | NF1, TP53                                 | pHGGMYCN     | GB                 | 3.82                          | Male   | Midline           | M0    | STR/Biopsy | NPTP     | Other                 | Focal RT +/- Chemotherapy | Yes | Palliative                  | Dead    | NA            | No                            |
| 5                                                 | SJHGG031621  | Non-IHG                | HGG                    | pHGG MYCN              | MYCN Amplification                        | NC           | AA                 | 3.29                          | Male   | Midline           | M0    | STR/Biopsy | NPTP     | Other                 | Focal RT +/- Chemotherapy | Yes | Palliative                  | Dead    | NA            | No                            |
| 6                                                 | SJPNET067661 | Non-IHG                | HGG                    | pHGG MYCN              | MYCN Amplification                        | pHGGMYCN     | HGNET              | 3.08                          | Female | Hemispheric       | M0    | GTR/NTR    | NPTP     | SJYC07-High/High-Like | Chemotherapy Only         | Yes | Focal RT                    | Dead    | NA            | No                            |
| 1                                                 | SJHGG063183  | Non-IHG                | LGG                    | DA,MYB- or MYBL1-alt   | MYB-PCDHGA1                               | DA MYB/MYBL1 | AA                 | 1.90                          | Female | Hemispheric       | M0    | STR/Biopsy | SJYC07   | SJYC07-Low/Low-Like   | Chemotherapy Only         | Yes | Surgery + Radiation         | Alive   | NA            | Yes                           |
| 2                                                 | SJHGG063183  | Non-IHG                | LGG                    | PA                     | BRAF rearrangement                        | PA           | APA                | 2.69                          | Female | Midline           | M+    | STR/Biopsy | SJYC07   | SJYC07-High/High-Like | Chemotherapy Only         | Yes | Targeted Therapy            | Alive   | NA            | No                            |
| 3                                                 | SJHGG030398  | Non-IHG                | LGG                    | DA,MYB- or MYBL1-alt   | MYBL1-MAML2                               | DA MYB/MYBL1 | AA                 | 2.23                          | Female | Hemispheric       | M0    | GTR/NTR    | SJYC07   | SJYC07-Low/Low-Like   | Chemotherapy Only         | No  | NA                          | Alive   | NA            | Yes                           |
| 4                                                 | SJHGG030497  | Non-IHG                | LGG                    | PLNTY                  | FGFR2-INA                                 | GG           | AA                 | 3.42                          | Female | Hemispheric       | M0    | GTR/NTR    | NPTP     | Other                 | Focal RT +/- Chemotherapy | No  | NA                          | Alive   | NA            | No                            |
| 1                                                 | SJBT032287   | Non-IHG                | Other-CNS Tumors       | CNS BCOR ITD           | BCOR ITD                                  | CNS BCOR ITD | HGNET              | 1.83                          | Female | Hemispheric       | M0    | GTR/NTR    | SJYC07   | SJYC07-Low/Low-Like   | Chemotherapy Only         | Yes | Surgery + Radiation (CS)    | Alive   | NA            | Yes                           |
| 2                                                 | SJPNET062475 | Non-IHG                | Other-CNS Tumors       | NET PLAGL1 FUS         | EWSR1-PLAGL1                              | NET PLAGL1   | HGNET              | 2.45                          | Female | Hemispheric       | M0    | GTR/NTR    | SJYC07   | SJYC07-Low/Low-Like   | Chemotherapy Only         | Yes | Surgery                     | Alive   | NA            | Yes                           |
| 3                                                 | SJHGG030895  | Non-IHG                | Other-CNS Tumors       | NET PATZ1              | MN1-PATZ1                                 | NET PATZ1    | GB                 | 3.63                          | Female | Hemispheric       | M0    | GTR/NTR    | NPTP     | Other                 | Focal RT +/- Chemotherapy | Yes | Surveillance                | Alive   | NA            | No                            |
| 4                                                 | SJPNET062466 | Non-IHG                | Other-CNS Tumors       | CNS BCOR ITD           | BCOR ITD                                  | CNS BCOR ITD | HGG                | 1.83                          | Male   | Cerebellum        | M0    | STR/Biopsy | SJYC07   | SJYC07-Low/Low-Like   | Chemotherapy Only         | Yes | Palliative                  | Dead    | NA            | Yes                           |
| 5                                                 | SJHGG063186  | Non-IHG                | Other-CNS Tumors       | ET PLAG                | Numerous PLAG1 fusions with amplification | ET PLAG      | GB                 | 2.49                          | Male   | Hemispheric       | M0    | GTR/NTR    | SJYC07   | SJYC07-Low/Low-Like   | Chemotherapy Only         | No  | NA                          | Alive   | NA            | Yes                           |
| 6                                                 | SJHGG070416  | Non-IHG                | Other-CNS Tumors       | ETMR                   | Fusion with C19MC miRs                    | ETMR_Atyp    | HGG                | 1.53                          | Male   | Cerebellum        | M+    | STR/Biopsy | SJYC07   | SJYC07-High/High-Like | Chemotherapy Only         | Yes | Unknown                     | Dead    | NA            | No                            |
| 7                                                 | SJHGG063184  | Non-IHG                | Other-CNS Tumors       | CNS SARC CIC           | CIC-DUX4                                  | CNS SARC CIC | PMG                | 1.88                          | Male   | Hemispheric       | M0    | STR/Biopsy | SJYC07   | SJYC07-Low/Low-Like   | Chemotherapy Only         | Yes | Surgery + Radiation (Focal) | Dead    | NA            | No                            |
| 8                                                 | SJHGG030242  | Non-IHG                | Other-CNS Tumors       | CNS NB FOXR2           | L1-FOXR2                                  | CNS NB FOXR2 | HGG                | 1.02                          | Male   | Hemispheric       | M0    | GTR/NTR    | SJYC07   | SJYC07-Low/Low-Like   | Chemotherapy Only         | Yes | Surgery + Radiation (Focal) | Dead    | NA            | No                            |
| 9                                                 | SJHGG030319  | Non-IHG                | Other-CNS Tumors       | CNS BCOR ITD           | BCOR ITD                                  | CNS BCOR ITD | GB                 | 1.42                          | Male   | Hemispheric       | M0    | GTR/NTR    | SJYC07   | SJYC07-Low/Low-Like   | Chemotherapy Only         | Yes | Surgery + Radiation (Focal) | Dead    | NA            | No                            |
| 1                                                 | SJHGG009016  | Non-IHG                | NC                     | NC                     | NA                                        | NC           | GB                 | 0.84                          | Male   | Hemispheric       | M0    | GTR/NTR    | SJYC07   | SJYC07-Low/Low-Like   | Chemotherapy Only         | No  | NA                          | Alive   | NA            | Yes                           |
| 2                                                 | SJHGG056496  | Non-IHG                | NC                     | NC                     | NA                                        | NC           | HGNET              | 1.13                          | Male   | Cerebellum        | M0    | GTR/NTR    | SJYC07   | SJYC07-Low/Low-Like   | Chemotherapy Only         | No  | NA                          | Alive   | NA            | No                            |
| 3                                                 | SJHGG058499  | Non-IHG                | NC                     | NC                     | NA                                        | NC           | HGNET              | 2.94                          | Male   | Hemispheric       | M0    | STR/Biopsy | SJYC07   | SJYC07-Low/Low-Like   | Chemotherapy Only         | Yes | Focal RT                    | Alive   | NA            | Yes                           |
| 4                                                 | SJHGG063174  | Non-IHG                | NC                     | NC                     | NA                                        | NC           | GB                 | 0.02                          | Male   | Hemispheric       | M0    | GTR/NTR    | SJYC07   | SJYC07-Low/Low-Like   | Chemotherapy Only         | No  | NA                          | Alive   | NA            | Yes                           |
| 5                                                 | SJHGG063201  | Non-IHG                | NC                     | NC                     | NA                                        | NC           | AA                 | 1.00                          | Male   | Hemispheric       | M0    | GTR/NTR    | SJYC07   | SJYC07-Low/Low-Like   | Chemotherapy Only         | No  | NA                          | Alive   | NA            | Yes                           |
| 6                                                 | SJHGG063188  | Non-IHG                | NC                     | NC                     | NA                                        | NC           | AA                 | 1.41                          | Female | Cerebellum        | M+    | STR/Biopsy | SJYC07   | SJYC07-High/High-Like | Chemotherapy Only         | No  | NA                          | Alive   | NA            | No                            |
| 7                                                 | SJHGG013318  | Non-IHG                | NC                     | NC                     | NA                                        | NC           | AA                 | 1.44                          | Male   | Hemispheric       | M0    | GTR/NTR    | SJYC07   | SJYC07-Low/Low-Like   | Chemotherapy Only         | No  | NA                          | Alive   | NA            | Yes                           |
| 8                                                 | SJHGG063202  | Non-IHG                | NC                     | NC                     | NA                                        | NC           | AA                 | 0.54                          | Male   | Midline           | M+    | STR/Biopsy | SJYC07   | SJYC07-High/High-Like | Chemotherapy Only         | No  | NA                          | Alive   | NA            | Yes                           |
| 9                                                 | SJHGG032034  | Non-IHG                | NC                     | NC                     | NA                                        | NC           | GB                 | 0.87                          | Female | Hemispheric       | M0    | GTR/NTR    | NPTP     | SJYC07-Low/Low-Like   | Chemotherapy Only         | No  | NA                          | Alive   | NA            | No                            |
| 10                                                | SJHGG032168  | Non-IHG                | NC                     | NC                     | NA                                        | NC           | GB                 | 1.56                          | Female | Midline           | M0    | STR/Biopsy | NPTP     | SJYC07-Low/Low-Like   | Chemotherapy Only         | No  | NA                          | Alive   | NA            | No                            |
| 1                                                 | SJHGG026     | ND                     | ND                     | ND                     | NA                                        | ND           | HGNET              | 1.53                          | Female | Hemispheric       | M0    | GTR/NTR    | SJYC07   | SJYC07-Low/Low-Like   | Chemotherapy Only         | No  | NA                          | Alive   | NA            | NA                            |
| 2                                                 | SJHGG02      | ND                     | ND                     | ND                     | NA                                        | ND           | AA                 | 1.02                          | Female | Midline           | M0    | STR/Biopsy | SJYC07   | SJYC07-Low/Low-Like   | Chemotherapy Only         | No  | NA                          | Alive   | NA            | NA                            |
| 3                                                 | SJHGG003     | ND                     | ND                     | ND                     | NA                                        | ND           | AA                 | 2.45                          | Male   | Midline           | M0    | STR/Biopsy | SJYC07   | SJYC07-Low/Low-Like   | Chemotherapy Only         | Yes | Chemotherapy                | Dead    | NA            | NA                            |
| 4                                                 | SJHGG063203  | ND                     | ND                     | ND                     | NA                                        | ND           | HGG                | 0.68                          | Male   | Midline           | M0    | STR/Biopsy | SJYC07   | SJYC07-Low/Low-Like   | Chemotherapy Only         | No  | NA                          | Alive   | NA            | NA                            |
| 5                                                 | SJHGG001     | ND                     | ND                     | ND                     | NA                                        | ND           | AA                 | 0.63                          | Female | Midline           | M0    | STR/Biopsy | SJYC07   | SJYC07-Low/Low-Like   | Chemotherapy Only         | Yes | Focal RT                    | Alive   | NA            | NA                            |

Supplemental Table 2

| Patient ID   | Anatomical Location                                                                                                                      | Anatomical Location (Hemispheric/Midline) | Anatomical Location (Supratentorial/Infratentorial) | Leptomeningeal spread (Yes/No/NE) | Margins (Circumscribed/Infiltrative) | Restricted diffusion in solid component (Yes/No/NE) | Hemorrhage Grade (0,1,2,3,4) | More than equal to 25% of Tumor is Hemorrhage (Yes/No) | T1 signal in solid component | T1 hypointensity (yes vs no) | T2 signal in solid component | T2 hypointensity (yes vs no) | Enhancement (Yes/No/NE) | Cysts/Necrosis Grade: (0/1/2/3/4/NE) | More than equal to 25% Cystic/Necrotic (Yes/No/NE) | Calcification (Yes/No/NE) | Midline Shift (Yes/No) | Hydrocephalous (Yes/No) | Uncal herniation (Yes/No) | Radiological Diagnosis by Blinded Radiologist (Tier-2) | Radiological Diagnosis by Blinded Radiologist (Tier-1) |
|--------------|------------------------------------------------------------------------------------------------------------------------------------------|-------------------------------------------|-----------------------------------------------------|-----------------------------------|--------------------------------------|-----------------------------------------------------|------------------------------|--------------------------------------------------------|------------------------------|------------------------------|------------------------------|------------------------------|-------------------------|--------------------------------------|----------------------------------------------------|---------------------------|------------------------|-------------------------|---------------------------|--------------------------------------------------------|--------------------------------------------------------|
| SJHGG063187  | Right parietal, temporal, occipital and to a lesser extent, frontal lobe, extending into splenium and right thalamus                     | Hemispheric                               | Supratentorial                                      | Yes                               | Infiltrative                         | No                                                  | 0                            | No                                                     | Hypointense                  | Yes                          | Hyperintense                 | No                           | Yes                     | 0                                    | No                                                 | No                        | Yes                    | Yes                     | No                        | High grade glioma                                      | High Grade Glioma                                      |
| SJHGG063188  | Diffuse involvement of cerebrum and cerebellum                                                                                           | Hemispheric and Cerebellar                | Supratentorial and Infratentorial                   | No                                | Circumscribed                        | No                                                  | 0                            | No                                                     | isointense                   | No                           | Hyperintense                 | No                           | Yes                     | 0                                    | No                                                 | No                        | No                     | No                      | No                        | High grade glioma                                      | High Grade Glioma                                      |
| SJHGG013318  | Left temporal lobe                                                                                                                       | Hemispheric                               | Supratentorial                                      | No                                | Circumscribed                        | No                                                  | 0                            | No                                                     | isointense                   | No                           | Hyperintense                 | No                           | Yes                     | 0                                    | No                                                 | No                        | No                     | No                      | No                        | Low Grade Glioma                                       | Low Grade Glioma                                       |
| SJHGG063183  | Optic chiasm/hypothalamus, extending into left optic tract and third ventricle                                                           | Midline                                   | Supratentorial                                      | Yes                               | Circumscribed                        | No                                                  | 1                            | No                                                     | Hypointense                  | Yes                          | Hyperintense                 | No                           | Yes                     | 1                                    | No                                                 | Yes                       | No                     | Yes                     | No                        | Low grade glioma                                       | Low grade glioma                                       |
| SJHGG030398  | Right inferior parietal lobule, juxtacortical                                                                                            | Hemispheric                               | Supratentorial                                      | No                                | Circumscribed                        | No                                                  | 0                            | No                                                     | isointense                   | No                           | Hyperintense                 | No                           | Yes                     | 0                                    | No                                                 | No                        | No                     | No                      | No                        | High grade glioma                                      | High Grade Glioma                                      |
| SJHGG063202  | Bilateral thalami, extending into midbrain                                                                                               | Midline                                   | Supratentorial                                      | No                                | Infiltrative                         | Yes                                                 | 0                            | No                                                     | isointense                   | No                           | Hyperintense                 | No                           | No                      | 0                                    | No                                                 | No                        | No                     | Yes                     | No                        | High Grade Glioma                                      | High Grade Glioma                                      |
| SJHGG030497  | Posterior aspect of left middle temporal gyrus, cortically based                                                                         | Hemispheric                               | Supratentorial                                      | No                                | Circumscribed                        | No                                                  | 1                            | No                                                     | isointense                   | No                           | Hyperintense                 | No                           | Yes                     | 4                                    | Yes                                                | Yes                       | No                     | No                      | No                        | Low grade glioma                                       | Low grade glioma                                       |
| SJPNET067666 | Right frontal, parietal, temporal and occipital lobes                                                                                    | Hemispheric                               | Supratentorial                                      | No                                | Circumscribed                        | Yes                                                 | 3                            | Yes                                                    | isointense                   | No                           | Hypointense                  | Yes                          | Yes                     | 1                                    | No                                                 | No                        | No                     | Yes                     | No                        | IHG like tumor                                         | IHG like tumor                                         |
| SJHGG009016  | Left frontal lobe                                                                                                                        | Hemispheric                               | Supratentorial                                      | No                                | Circumscribed                        | Yes                                                 | 1                            | No                                                     | isointense                   | No                           | Hypointense                  | Yes                          | Yes                     | 3                                    | Yes                                                | No                        | No                     | No                      | No                        | IHG like tumor                                         | IHG like tumor                                         |
| SJHGG063176  | Left frontal and parietal lobes                                                                                                          | Hemispheric                               | Supratentorial                                      | No                                | Circumscribed                        | Yes                                                 | 1                            | No                                                     | isointense                   | No                           | Hypointense                  | Yes                          | Yes                     | 4                                    | Yes                                                | No                        | Yes                    | No                      | No                        | IHG like tumor                                         | IHG like tumor                                         |
| SJHGG063178  | Right pre/post central gyri                                                                                                              | Hemispheric                               | Supratentorial                                      | No                                | Circumscribed                        | No                                                  | 1                            | No                                                     | isointense                   | No                           | Hyperintense                 | No                           | Yes                     | 0                                    | No                                                 | No                        | No                     | No                      | No                        | Incomplete DWI sequences-NE                            | NE                                                     |
| SJHGG058477  | Right frontal, parietal and temporal lobes, extending into right lateral ventricle                                                       | Hemispheric                               | Supratentorial                                      | No                                | Circumscribed                        | Yes                                                 | 2                            | Yes                                                    | isointense                   | No                           | isointense                   | No                           | Yes                     | 2                                    | Yes                                                | No                        | Yes                    | Yes                     | No                        | IHG like tumor                                         | IHG like tumor                                         |
| SJHGG063174  | Left parietal, temporal and occipital lobes, extension into left basal ganglia and thalamus                                              | Hemispheric                               | Supratentorial                                      | No                                | Circumscribed                        | Yes                                                 | 3                            | Yes                                                    | isointense                   | No                           | isointense                   | No                           | Yes                     | 3                                    | Yes                                                | No                        | Yes                    | Yes                     | No                        | IHG like tumor                                         | IHG like tumor                                         |
| SJHGG063179  | Right frontal white matter                                                                                                               | Hemispheric                               | Supratentorial                                      | NE                                | Circumscribed                        | NE                                                  | 4                            | Yes                                                    | Iso and Hyperintense         | No                           | Hypointense and Hyperintense | No                           | NE                      | NE                                   | NE                                                 | No                        | Yes                    | Yes                     | No                        | Entire mass is hemorrhagic-NE                          | NE                                                     |
| SJHGG010328  | Right parietal and occipital lobes, extending into right lateral ventricle                                                               | Hemispheric                               | Supratentorial                                      | No                                | Circumscribed                        | NE                                                  | 4                            | Yes                                                    | Iso and Hyperintense         | No                           | Hypointense and Hyperintense | No                           | NE                      | NE                                   | NE                                                 | No                        | No                     | No                      | No                        | Entire mass is hemorrhagic-NE                          | NE                                                     |
| SJPNET030836 | Left occipital, parietal and temporal lobe                                                                                               | Hemispheric                               | Supratentorial                                      | No                                | Circumscribed                        | NE                                                  | 4                            | Yes                                                    | isointense                   | No                           | isointense                   | No                           | Yes                     | 3                                    | Yes                                                | No                        | Yes                    | Yes                     | No                        | IHG like tumor                                         | IHG like tumor                                         |
| SJHGG030166  | Left frontal deep white matter, extending into left basal ganglia and lateral ventricle                                                  | Hemispheric                               | Supratentorial                                      | No                                | Circumscribed                        | NE                                                  | 4                            | Yes                                                    | Iso and Hyperintense         | No                           | Hypointense and Hyperintense | No                           | NE                      | NE                                   | NE                                                 | No                        | No                     | Yes                     | No                        | Entire mass is hemorrhagic-NE                          | NE                                                     |
| SJHGG063182  | Right parietal lobe                                                                                                                      | Hemispheric                               | Supratentorial                                      | No                                | Circumscribed                        | Yes                                                 | 1                            | No                                                     | isointense                   | No                           | Hyperintense                 | No                           | Yes                     | 4                                    | Yes                                                | No                        | No                     | Yes                     | No                        | High grade glioma                                      | High Grade Glioma                                      |
| SJHGG030397  | Right parietal and occipital lobes, extending into right lateral ventricle                                                               | Hemispheric                               | Supratentorial                                      | No                                | Circumscribed                        | NE                                                  | 4                            | Yes                                                    | Iso and Hyperintense         | No                           | Hypointense and Hyperintense | No                           | NE                      | 2                                    | Yes                                                | No                        | No                     | Yes                     | No                        | Entire mass is hemorrhagic-NE                          | NE                                                     |
| SJHGG030673  | Left frontal lobe                                                                                                                        | Hemispheric                               | Supratentorial                                      | NE                                | Infiltrative                         | Yes                                                 | 1                            | No                                                     | Hypointense                  | No                           | Hypointense                  | Yes                          | NE                      | 2                                    | Yes                                                | Yes                       | No                     | Yes                     | No                        | High grade glioma                                      | High grade glioma                                      |
| SJHGG030796  | Right parietal, temporal and occipital lobes                                                                                             | Hemispheric                               | Supratentorial                                      | NE                                | Circumscribed                        | NE                                                  | 4                            | Yes                                                    | Iso and Hyperintense         | No                           | Hypointense and Hyperintense | No                           | NE                      | 1                                    | No                                                 | No                        | Yes                    | No                      | No                        | Entire mass is hemorrhagic-NE                          | NE                                                     |
| SJHGG031178  | Left frontal and temporal lobes                                                                                                          | Hemispheric                               | Supratentorial                                      | No                                | Circumscribed                        | Yes                                                 | 2                            | Yes                                                    | isointense                   | No                           | isointense                   | No                           | Yes                     | 2                                    | Yes                                                | Yes                       | Yes                    | No                      | No                        | High grade glioma/Other (ATRT)                         | Other                                                  |
| SJBT031676   | Left parietal, temporal and occipital lobes, extending to splenium                                                                       | Hemispheric                               | Supratentorial                                      | No                                | Circumscribed                        | NE                                                  | 2                            | Yes                                                    | isointense                   | No                           | isointense                   | No                           | Yes                     | 1                                    | No                                                 | Yes                       | Yes                    | Yes                     | No                        | IHG like tumor                                         | IHG like tumor                                         |
| SJHGG061615  | Right frontal, parietal, occipital and temporal lobes                                                                                    | Hemispheric                               | Supratentorial                                      | No                                | Circumscribed                        | Yes                                                 | 1                            | No                                                     | Hypointense                  | Yes                          | Hypointense                  | Yes                          | Yes                     | 3                                    | Yes                                                | NE                        | Yes                    | Yes                     | Yes                       | IHG-like tumor                                         | IHG-like tumor                                         |
| SJHGG063180  | Left frontal, parietal and temporal lobes, smaller tumor in right frontal lobe                                                           | Hemispheric                               | Supratentorial                                      | No                                | Circumscribed                        | Yes                                                 | 0                            | No                                                     | isointense                   | No                           | Hypointense                  | Yes                          | Yes                     | 2                                    | Yes                                                | NE                        | Yes                    | No                      | Yes                       | IHG-like tumor                                         | IHG-like tumor                                         |
| SJHGG063177  | Left frontal and temporal lobes                                                                                                          | Hemispheric                               | Supratentorial                                      | No                                | Circumscribed                        | Yes                                                 | 2                            | Yes                                                    | Hypointense                  | Yes                          | Hypointense                  | Yes                          | Yes                     | 2                                    | Yes                                                | NE                        | Yes                    | No                      | Yes                       | IHG-like tumor                                         | IHG-like tumor                                         |
| SJHGG063181  | Right frontal, parietal and temporal lobes                                                                                               | Hemispheric                               | Supratentorial                                      | No                                | Circumscribed                        | Yes                                                 | 3                            | Yes                                                    | Hypointense                  | Yes                          | Hypointense                  | Yes                          | Yes                     | 3                                    | Yes                                                | NE                        | Yes                    | No                      | Yes                       | IHG-like tumor                                         | IHG-like tumor                                         |
| SJPNET067661 | Left frontal lobe                                                                                                                        | Hemispheric                               | Supratentorial                                      | No                                | Infiltrative                         | Yes                                                 | 0                            | No                                                     | isointense                   | No                           | Hyperintense                 | No                           | Yes                     | 0                                    | No                                                 | No                        | No                     | No                      | No                        | High grade glioma                                      | High grade glioma                                      |
| SJPNET062468 | Left temporal, occipital and parietal lobes                                                                                              | Hemispheric                               | Supratentorial                                      | No                                | Circumscribed                        | Yes                                                 | 0                            | No                                                     | isointense                   | No                           | Hypointense                  | Yes                          | Yes                     | 2                                    | Yes                                                | NE                        | Yes                    | No                      | No                        | High grade glioma/Other (ATRT)                         | Other                                                  |
| SJEPD066767  | Brainstem: right cerebral peduncle, right greater than left pons and right lateral medulla                                               | Brainstem                                 | Infratentorial                                      | No                                | Circumscribed                        | No                                                  | 0                            | No                                                     | Hypointense                  | Yes                          | Hyperintense                 | No                           | No                      | 0                                    | No                                                 | No                        | No                     | Yes                     | No                        | High grade glioma                                      | High Grade Glioma                                      |
| SJPNET070484 | Right thalamus/posterior limb of internal capsule, cerebral peduncle, corona radiata, centrum semiovale, left thalamus, splenium         | Midline                                   | Supratentorial                                      | No                                | Infiltrative                         | Yes                                                 | 0                            | No                                                     | isointense                   | No                           | Hyperintense                 | No                           | Yes                     | 2                                    | Yes                                                | No                        | No                     | Yes                     | No                        | High grade glioma                                      | High Grade Glioma                                      |
| SJHGG031139  | Multiple cortical and subcortical lesions in the inferior left frontal lobe                                                              | Hemispheric                               | Supratentorial                                      | No                                | Circumscribed                        | Yes                                                 | 0                            | No                                                     | isointense                   | No                           | Hyperintense                 | No                           | Yes                     | 0                                    | No                                                 | No                        | No                     | No                      | No                        | High grade glioma                                      | High grade glioma                                      |
| SJHGG031321  | Left globus pallidus, thalamus, optic tract, centrum semiovale, hypothalamus and left cerebral peduncle. Crosses midline at hypothalamus | Midline                                   | Supratentorial                                      | No                                | Infiltrative                         | No                                                  | 0                            | No                                                     | isointense                   | No                           | isointense                   | No                           | Yes                     | 1                                    | No                                                 | No                        | Yes                    | No                      | No                        | High grade glioma                                      | High grade glioma                                      |
| SJBT031450   | Left occipital and posterior temporal lobes                                                                                              | Hemispheric                               | Supratentorial                                      | Yes                               | Circumscribed                        | Yes                                                 | 2                            | Yes                                                    | isointense                   | No                           | Hyperintense                 | No                           | Yes                     | 2                                    | Yes                                                | No                        | Yes                    | No                      | No                        | IHG like tumor                                         | IHG like tumor                                         |
| SJHGG031621  | Right greater than left pons, right tectum and bilateral thalam                                                                          | Midline                                   | Infratentorial                                      | No                                | Infiltrative                         | yes                                                 | 0                            | No                                                     | isointense                   | No                           | Hyperintense                 | No                           | Yes                     | 1                                    | No                                                 | No                        | No                     | Yes                     | No                        | High grade glioma                                      | High grade glioma                                      |
| SJHGG032168  | Brainstem: right greater than left pons and medulla                                                                                      | Midline                                   | Infratentorial                                      | No                                | Infiltrative                         | Yes                                                 | 0                            | No                                                     | Hypointense                  | Yes                          | Hyperintense                 | No                           | No                      | 0                                    | No                                                 | No                        | No                     | No                      | No                        | High grade glioma                                      | High grade glioma                                      |
| SJPNET062466 | Right greater than left postero-inferior cerebellar hemispheres and vermis                                                               | Cerebellar                                | Infratentorial                                      | No                                | Circumscribed                        | Yes                                                 | 1                            | No                                                     | Hypointense                  | Yes                          | Hyperintense                 | No                           | Yes                     | 2                                    | Yes                                                | NE                        | No                     | Yes                     | No                        | Other (ATRT)                                           | Other                                                  |
| SJBT032267   | Right parietal, temporal and occipital lobes, extending into right lateral ventricle                                                     | Hemispheric                               | Supratentorial                                      | No                                | Circumscribed                        | Yes                                                 | 2                            | Yes                                                    | Hypointense                  | Yes                          | Hyperintense                 | No                           | Yes                     | 0                                    | No                                                 | NE                        | Yes                    | No                      | No                        | High grade glioma/Other (ETMR)                         | Other                                                  |
| SJHGG063184  | Left frontal deep white matter, extending into the left lateral ventricle                                                                | Hemispheric                               | Supratentorial                                      | No                                | Circumscribed                        | NE                                                  | 3                            | Yes                                                    | Hypointense                  | Yes                          | Hyperintense                 | No                           | Yes                     | 4                                    | Yes                                                | NE                        | Yes                    | No                      | No                        | No ADC map-NE                                          | NE                                                     |
| SJHGG030242  | Left basal ganglia/subinsular region                                                                                                     | Hemispheric                               | Supratentorial                                      | No                                | Circumscribed                        | Yes                                                 | 2                            | Yes                                                    | Hypointense                  | Yes                          | Hyperintense                 | No                           | Yes                     | 3                                    | Yes                                                | No                        | No                     | No                      | No                        | High grade glioma/Other (ATRT)                         | Other                                                  |
| SJHGG030319  | Left temporal lobe                                                                                                                       | Hemispheric                               | Supratentorial                                      | No                                | Circumscribed                        | Yes                                                 | 1                            | No                                                     | isointense                   | No                           | Hyperintense                 | No                           | Yes                     | 0                                    | No                                                 | Yes                       | No                     | No                      | No                        | High grade glioma/Other(ETMR)                          | Other                                                  |

Supplemental Table 3

|                                       | IHG (N=20)  | HGG (N=6)  | Other-CNS tumor (N=5) | LGG (n=4)  | Total (N=35) | P-value       |
|---------------------------------------|-------------|------------|-----------------------|------------|--------------|---------------|
| <b>Anatomical Location N (%)</b>      |             |            |                       |            |              | <b>0.0011</b> |
| Brainstem                             | 0 (0.0%)    | 1 (16.7%)  | 0 (0.0%)              | 0 (0.0%)   | 1 (2.9%)     |               |
| Cerebellar                            | 0 (0.0%)    | 0 (0.0%)   | 1 (20.0%)             | 0 (0.0%)   | 1 (2.9%)     |               |
| Hemispheric                           | 20 (100.0%) | 2 (33.3%)  | 4 (80.0%)             | 3 (75.0%)  | 29 (82.9%)   |               |
| Midline                               | 0 (0.0%)    | 3 (50.0%)  | 0 (0.0%)              | 1 (25.0%)  | 4 (11.4%)    |               |
| Missing                               | 0           | 0          | 0                     | 0          | 0            |               |
| <b>Anatomical Location N (%)</b>      |             |            |                       |            |              | 0.0512        |
| Infratentorial                        | 0 (0.0%)    | 3 (33.3%)  | 1 (20.0%)             | 0 (0.0%)   | 4 (10.0%)    |               |
| Supratentorial                        | 20 (100.0%) | 4 (66.7%)  | 4 (80.0%)             | 4 (100.0%) | 36 (90.0%)   |               |
| Missing                               | 0           | 0          | 0                     | 0          | 0            |               |
| <b>Leptomeningeal Spread N (%)</b>    |             |            |                       |            |              | 0.0881        |
| No                                    | 16 (94.1%)  | 6 (100.0%) | 5 (100.0%)            | 2 (50.0%)  | 29 (90.6%)   |               |
| Yes                                   | 1 (5.9%)    | 0 (0.0%)   | 0 (0.0%)              | 2 (50.0%)  | 3 (9.4%)     |               |
| Not evaluable                         | 3           | 0          | 0                     | 0          | 3            |               |
| <b>Margins N (%)</b>                  |             |            |                       |            |              | <b>0.0073</b> |
| Circumscribed                         | 19 (95.0%)  | 2 (33.3%)  | 5 (100.0%)            | 3 (75.0%)  | 20 (82.9%)   |               |
| Infiltrative                          | 1 (5.0%)    | 4 (66.7%)  | 0 (0.0%)              | 1 (25.0%)  | 6 (17.1%)    |               |
| <b>Restricted Diffusion N (%)</b>     |             |            |                       |            |              | <b>0.0057</b> |
| No                                    | 2 (14.3%)   | 2 (33.3%)  | 0 (0.0%)              | 4 (100.0%) | 8 (28.6%)    |               |
| Yes                                   | 12 (85.7%)  | 4 (66.7%)  | 4 (100.0%)            | 0 (0.0%)   | 24 (71.4%)   |               |
| Not evaluable                         | 6           | 0          | 1                     | 0          | 7            |               |
| <b>&gt;25% Tumor Hemorrhage N (%)</b> |             |            |                       |            |              | <b>0.0036</b> |
| No                                    | 7 (35.0%)   | 6 (100.0%) | 2 (40.0%)             | 4 (100.0%) | 19 (54.3%)   |               |
| Yes                                   | 13 (65.0%)  | 0 (0.0%)   | 3 (60.0%)             | 0 (0.0%)   | 17 (45.7%)   |               |
| <b>T1 Hypointensity N (%)</b>         |             |            |                       |            |              | <b>0.0207</b> |
| No                                    | 17 (85.0%)  | 5 (83.3%)  | 1 (20.0%)             | 2 (50.0%)  | 25 (71.4%)   |               |
| Yes                                   | 3 (15.0%)   | 1 (16.7%)  | 4 (80.0%)             | 2 (50.0%)  | 10 (28.6%)   |               |
| <b>T2 Hypointensity N (%)</b>         |             |            |                       |            |              | 0.3453        |
| No                                    | 13 (65.0%)  | 5 (83.3%)  | 5 (100.0%)            | 4 (100.0%) | 27 (77.1%)   |               |
| Yes                                   | 7 (35.0%)   | 1 (16.7%)  | 0 (0.0%)              | 0 (0.0%)   | 8 (22.9%)    |               |
| <b>Enhancement N (%)</b>              |             |            |                       |            |              | 0.5172        |
| No                                    | 0 (0.0%)    | 1 (16.7%)  | 0 (0.0%)              | 0 (0.0%)   | 1 (3.4%)     |               |
| Yes                                   | 14 (100.0%) | 5 (83.3%)  | 5 (100.0%)            | 4 (100.0%) | 28 (96.6%)   |               |
| Not evaluable                         | 6           | 0          | 0                     | 0          | 6            |               |
| <b>&gt; 25% Tumor Cystic N (%)</b>    |             |            |                       |            |              | 0.2612        |
| No                                    | 5 (29.4%)   | 4 (66.7%)  | 2 (40.0%)             | 3 (75.0%)  | 14 (43.8%)   |               |
| Yes                                   | 12 (70.6%)  | 2 (33.3%)  | 3 (60.0%)             | 1 (25.0%)  | 18 (62.3%)   |               |
| Not evaluable                         | 3           | 0          | 0                     | 0          | 3            |               |
| <b>Calcification N (%)</b>            |             |            |                       |            |              | 0.1516        |
| No                                    | 13 (81.3%)  | 5 (100.0%) | 1 (50.0%)             | 2 (50.0%)  | 21 (77.8%)   |               |
| Yes                                   | 3 (18.8%)   | 0 (0.0%)   | 1 (50.0%)             | 2 (50.0%)  | 6 (22.2%)    |               |
| Not evaluable                         | 4           | 1          | 3                     | 0          | 8            |               |
| <b>Midline Shift N (%)</b>            |             |            |                       |            |              | 0.5084        |
| No                                    | 8 (40.0%)   | 4 (66.7%)  | 3 (60.0%)             | 3 (75.0%)  | 18 (51.4%)   |               |
| Yes                                   | 12 (60.0%)  | 2 (33.3%)  | 2 (40.0%)             | 1 (25.0%)  | 17 (48.6%)   |               |
| <b>Hydrocephalous N (%)</b>           |             |            |                       |            |              | 0.6378        |
| No                                    | 9 (45.0%)   | 3 (50.0%)  | 4 (80.0%)             | 2 (50.0%)  | 18 (51.4%)   |               |
| Yes                                   | 11 (55.0%)  | 3 (50.0%)  | 1 (20.0%)             | 2 (50.0%)  | 17 (48.6%)   |               |
| <b>Uncal Herniation N (%)</b>         |             |            |                       |            |              | 0.6516        |
| No                                    | 16 (80.0%)  | 6 (100.0%) | 5 (100.0%)            | 4 (100.0%) | 31 (88.6%)   |               |
| Yes                                   | 4 (20.0%)   | 0 (0.0%)   | 0 (0.0%)              | 0 (0.0%)   | 4 (11.4%)    |               |

Supplemental Table 4

| Diagnosis | ID          | First Craniotomy Indication                             | Result of First Craniotomy    | Transfusion During Required During Surgery | Hypovolemic Shock During Surgery | Craniotomy -2 | Reason/Indication                         | Result                        | Massive Transfusion During Required During Surgery | Hypovolemic Shock During Surgery | Craniotomy -3 | Reason/Indication                       | Result                            | Massive Transfusion During Surgery |
|-----------|-------------|---------------------------------------------------------|-------------------------------|--------------------------------------------|----------------------------------|---------------|-------------------------------------------|-------------------------------|----------------------------------------------------|----------------------------------|---------------|-----------------------------------------|-----------------------------------|------------------------------------|
| IHG       | SJBT031842  | Decompression of Brain                                  | STR                           | Yes                                        | No                               | No            | NA                                        | NA                            | NA                                                 | NA                               | NA            | NA                                      | NA                                | NA                                 |
| IHG       | SJBT031676  | Maximal Safe Surgical Resection                         | Aborted Due to Bleeding (STR) | Yes                                        | Yes                              | Yes           | Maximal Safe Surgical Resection           | Aborted Due to Bleeding (STR) | Yes                                                | No                               | Yes           | Attempt-Maximal Safe Surgical Resection | GTR                               | No                                 |
| IHG       | SJBT031450  | Tissue Diagnosis/Biopsy                                 | Biopsy                        | No                                         | No                               | Yes           | Worsening Clinical status - increased ICP | NTR                           | Yes                                                | No                               | Yes           | Recurrence                              | NTR                               | NA                                 |
| IHG       | SJHGG010328 | Decompression of Brain                                  | STR                           | Yes                                        | No                               | Yes           | Maximal Safe Surgical Resection           | GTR                           | No                                                 | No                               | No            | NA                                      | NA                                | NA                                 |
| IHG       | SJHGG030166 | Maximal Safe Surgical Resection                         | GTR                           | No                                         | No                               | No            | NA                                        | NA                            | NA                                                 | NA                               | NA            | NA                                      | NA                                | NA                                 |
| IHG       | SJHGG030397 | Maximal Safe Surgical Resection                         | GTR                           | Yes                                        | No                               | Yes           | Evacuation of Resection Bed Hemorrhage    | Successful                    | Yes                                                | No                               | No            | NA                                      | NA                                | NA                                 |
| IHG       | SJHGG030673 | Maximal Safe Surgical Resection                         | GTR                           | No                                         | No                               | Yes           | NA                                        | NA                            | NA                                                 | NA                               | No            | NA                                      | NA                                | NA                                 |
| IHG       | SJHGG030796 | Maximal Safe Surgical Resection/ Decompression of Brain | Aborted Due to Bleeding (STR) | Yes                                        | No                               | Yes           | Development of Intra-Tumoral Hemorrhage   | STR                           | Yes                                                | Yes                              | No            | NA                                      | NA                                | NA                                 |
| IHG       | SJHGG031139 | Tissue Diagnosis/Biopsy                                 | Biopsy                        | No                                         | No                               | No            | NA                                        | NA                            | NA                                                 | NA                               | NA            | NA                                      | NA                                | NA                                 |
| IHG       | SJHGG031178 | Maximal Safe Surgical Resection/ Decompression of Brain | NTR                           | No                                         | No                               | Yes           | Tumor Re-growth                           | NTR                           | No                                                 | No                               | Yes           | Recurrence                              | NTR                               | No                                 |
| IHG       | SJHGG063182 | Maximal Safe Surgical Resection                         | GTR                           | No                                         | No                               | No            | NA                                        | NA                            | NA                                                 | NA                               | NA            | NA                                      | NA                                | NA                                 |
| IHG       | SJHGG063178 | Maximal Safe Surgical Resection                         | NTR                           | No                                         | No                               | No            | NA                                        | NA                            | NA                                                 | NA                               | NA            | NA                                      | NA                                | NA                                 |
| IHG       | SJHGG063176 | Maximal Safe Surgical Resection/ Decompression of Brain | GTR                           | Yes                                        | Yes                              | Yes           | Evacuation of ventricular hemorrhage      | Successful                    | No                                                 | No                               | No            | NA                                      | NA                                | NA                                 |
| IHG       | SJHGG063176 | Tissue Diagnosis/Biopsy                                 | Biopsy                        | Yes                                        | No                               | Yes           | Maximal Safe Surgical Resection           | GTR                           | Yes                                                | No                               | No            | NA                                      | NA                                | NA                                 |
| IHG       | SJHGG063179 | Maximal Safe Surgical Resection                         | GTR                           | Yes                                        | Yes                              | No            | NA                                        | NA                            | NA                                                 | NA                               | NA            | NA                                      | NA                                | NA                                 |
| IHG       | SJHGG058477 | Tissue Diagnosis/Biopsy                                 | Biopsy                        | No                                         | No                               | Yes           | Post Chemotherapy cyst formation          | GTR                           | No                                                 | No                               | Yes           | Acquired Hydrocephalous, shunt failure  | Shunt Revision and fluid drainage | No                                 |
